# Supplementary material
Source: PubMed Central journal article supplement (PMC6955234)
Supplement: pnas.1901734117.sapp.pdf [file pnas.1901734117.sapp.pdf]

## Supplementary Information for

Kappa-on-Heavy (KoH) bodies: A potential new class of fully-human antibody-like therapeutic agents with novel antigen-binding properties

Lynn E. Macdonald<sup>1</sup>, Karoline A. Meagher, Matthew C. Franklin, Natasha Levenkova, Johanna Hansen, Ashok T. Badithe, Maggie Zhong, Pamela Krueger, Ashique Rafique, Naxin Tu, James Shevchuk, Saurabh Wadhwa, George Ehrlich, Joannie Bautista, Craig Grant, Lakeisha Esau, William T. Poueymirou, Wojtek Auerbach, Lori Morton, Robert Babb, Gang Chen, Tammy Huang, Douglas MacDonald, Kenneth Graham, Cagan Gurer, Vera A. Voronina, John R. McWhirter, Chunguang Guo, George D. Yancopoulos, Andrew J. Murphy

<sup>1</sup>Corresponding author: Lynn Macdonald

Email: [lynn.macdonald@regeneron.com](mailto:lynn.macdonald@regeneron.com)

### **This PDF file includes:**

Supplementary Materials and Methods

Supplementary Figures and Figure Legends for S1 to S10

Supplementary Tables S1 to S8

## **SI Materials and Methods**

### **Mouse Construction & B-cell Analysis**

#### ***Construction of BACvecs by bacterial homologous recombination and ligation.***

Mouse and human BACs that span the 5' and 3' ends of the IgH and IgK locus were identified as previously described [1]. Using the Velocigene<sup>®</sup> technology [2], bacterial homologous recombination was performed as described previously to insert the human IgH and IgK Bacs into the mouse IgH and IgK locus, respectively, to make VI mice. To make the KoH mice, those same human IgK BACs were used to insert the human IgK locus into the mouse heavy chain locus. A detailed description of the steps for constructing all BAC vectors is provided in the SI Appendix (SI Appendix, Fig. S1, Tables S1-S3).

***Modification of ES cells and generation of mice.*** Targeting of ES cells (F1H4) was performed using the VelociGene<sup>®</sup> method as previously described [2]. Derivation of mice from modified ES cells by eight-cell morula injection was as previously described [3]. Mice with humanized IgK variable loci [1] were bred together with mice that have humanized IgK variable on mouse IgH constant loci to make the KoH mice. The sequences of qPCR probes and primers used to screen for targeted ES cells and mice are included in the SI Appendix (Table S4). All mice were housed and bred in specific pathogen-free conditions at Regeneron Pharmaceuticals. All mouse studies were overseen and approved by Regeneron's Institutional Animal Care and Use Committee (IACUC).

***Analysis of bone marrow and spleen.*** Eight VelocImmune<sup>®</sup> (VI) control mice (23-26 week old males and females) and ten KoH mice (25 week old males and females) were sacrificed. Spleens and bone marrow were harvested. Bone marrow was collected from femurs by flushing with complete RPMI medium (RPMI medium supplemented with fetal calf serum, sodium pyruvate, HEPES, 2-mercaptoethanol, non-essential amino acids, and gentamycin). Red blood cells from spleen and bone marrow preparations were lysed with ACK lysis buffer, followed by washing with complete RPMI medium.

Isolated cells ( $1 \times 10^6$ ) were incubated with anti-mouse CD16/CD32 (2.4G2, BD) on ice for 10 minutes, followed by labeling with the following antibody cocktail for 30 min on ice. Bone marrow panel: anti-mouse FITC-CD43 (1B11, BioLegend), PeCy7-IgM (II/41, eBioscience), PerCP-Cy5.5-IgD (11-26c.2a, BioLegend), APC- B220 (RA3-6B2, eBioscience), APC-H7-CD19 (ID3, BD) and Pacific Blue-CD3 (17A2, BioLegend). Bone marrow and spleen panel: anti-mouse FITC-IgK (187.1, BD), PE-IgL (RML-42, BioLegend), PeCy7-IgM (II/41, eBioscience), PerCP-Cy5.5-IgD (11-26c.2a, BioLegend), Pacific Blue-CD3 (17A2, BioLegend), APC- B220 (RA3-6B2, eBioscience), APC-H7-CD19 (ID3, BD). Following staining, cells were washed and fixed in 2% formaldehyde. Data acquisition was performed on a BD LSRFortessa flow cytometer and analyzed with FlowJo. Bone marrow: immature B cells ( $B220^{int} IgM^+$ ), mature B cells ( $B220^{high} IgM^+$ ), Pro-B cells ( $IgM^- B220^{int} CD43^{high}$ ), Pre-B cells ( $IgM^- B220^{int} CD43^{int}$ ). Spleen and bone marrow: B cells ( $CD19^+ CD3^-$ ), T cells ( $CD3^+ CD19^-$ ),  $IgK^+$  B cells ( $CD19^+ IgK^+ IgL^-$ ),  $IgL^+$  B cells ( $CD19^+ IgK^- IgL^+$ ), mature B cells ( $CD19^+ IgD^{high} IgM^{int}$ ), transitional/immature B cells ( $CD19^+ IgD^{int} IgM^{high}$ ).

***Next Generation Sequencing of antibody repertoires.*** Splenic B cells were positively enriched from total splenocytes by magnetic cell sorting using anti-CD19 (mouse) magnetic beads and MACS® columns (Miltenyi Biotech). Total RNA was isolated from the purified splenic B cells using an RNeasy Plus RNA isolation kit (Qiagen) according to manufacturer's instructions. Reverse transcription was performed to generate cDNA containing IgM or IgK constant region sequence, using a SMARTer™ RACE cDNA Amplification Kit (Clontech) and a IgM or IgK specific primer (SI Appendix, Table S5, RT primers). During this process, a DNA sequence corresponding to the reverse complement of primer PE2-PIIA (SI Appendix, Table S5), was attached to the 3' end of the newly synthesized cDNAs. Purified IgM or IgK specific cDNAs were then amplified by the 1st round PCR using the PE2-PIIA primer and a corresponding constant primer listed in the SI Appendix (Table S5). PCR products between 450-700bp were isolated using Pippin Prep (SAGE Science) and these fragments were further amplified by a 2nd round PCR using the primers listed in the SI Appendix (Table S5). PCR products between 400bp-700bp were isolated, purified, and quantified by qPCR using a KAPA Library

Quantification Kit (KAPA Biosystems) before loading onto a Miseq sequencer (Illumina) for sequencing using Miseq Reagent Kits v3 (2x300 cycles).

For bioinformatic analysis, raw Illumina sequences were de-multiplexed and filtered based on quality, length, and perfect match to the corresponding constant region primer. Overlapping paired-end reads were merged and analyzed using IgBLAST (NCBI, v2.2.25+) to align rearranged light chain sequences to the human germline V and J gene database. Productive and non-productive joining events were noted along with the presence of stop codons. CDR3 sequences and likely non-template nucleotides were extracted using International Immunogenetics Information System (IMGT) boundaries.

### **Immunization and Antibody Isolation**

***Immunization.*** VI and KoH mice were immunized using a BSA conjugate of marinobufagenin (MBG) generated as previously described [4] or a KLH conjugate of nicotine. Pre-immune serum was collected from the mice prior to the initiation of immunization. The mice were boosted via footpad route twice a week for a total of 7-10 boosts using standard adjuvants. The mice were bled and anti-serum titers assayed. For KoH mice, after completion of 6 boosts, mice were allowed a resting phase of 4 to 5 weeks, and then 4 additional boosts with the immunogens were administered. Mice were bled and anti-serum titers assayed on biotin-MBG.

***Anti-serum Titer Determination.*** Antibody titers in serum against the immunogen were determined using ELISA. 96-well microtiter plates (Thermo Scientific) were coated with streptavidin in phosphate-buffered saline (PBS, Irvine Scientific) overnight at 5 µg/ml. Plates were washed with phosphate-buffered saline containing 0.05% Tween 20 (PBS-T, Sigma-Aldrich) and blocked with 250 µl of 0.5% bovine serum albumin (BSA, Sigma-Aldrich) in PBS for 1 h at room temperature. Biotin-MBG was then coated at 1 µg/ml in PBS, for 1 h at room temperature. The plates were washed with PBS-T. Pre-immune and immune anti-sera were serially diluted three-fold in 0.5% BSA-PBS and added to the plates for 1 h at room temperature. The plates were washed and goat anti-mouse IgG-Fc Horseradish Peroxidase- (HRP) conjugated secondary antibody (Jackson ImmunoResearch) was added to the plates and incubated for 1 h at

room temperature. Plates were washed and developed using TMB/H<sub>2</sub>O<sub>2</sub> as substrate by incubating for 20 min. The reaction was stopped with acid and plates read on a spectrophotometer (Victor, Perkin Elmer) at 450 nm. Antibody titers were computed using Graphpad PRISM software.

***Quantitation of total serum IgM and IgG.*** Total serum IgM and IgG were determined by ELISA. Plates were coated with 1 µg/ml of either anti-mouse IgM or anti-mouse IgG to quantitate total IgM and IgG, respectively. Standard plots were generated using mouse IgG (Sigma) and mouse IgM (Biolegend) for quantitating IgM and IgG levels.

***Antibody and KoH-body isolation.*** Splenocytes were stained with FITC-conjugated anti-mouse Fc, incubated with biotinylated MBG and then stained with PE-conjugated streptavidin. The stained cells were analyzed by flow cytometry. Single B-cells that were positive for both anti-mFc and MBG were sorted and plated. RT-PCR of antibody genes from these individual B cells was performed as described [5]. Briefly, cDNAs for each single B cell were synthesized via reverse transcriptase (RT) reaction (Superscript III, Invitrogen). Each resulting RT product was then split and transferred into two corresponding wells on two 384-well plates. One set of the resulting RT products was first amplified by PCR using a 5' degenerate primer specific for human IgG heavy chain variable region leader sequence (for antibodies) or a 5' degenerate primer specific for human kappa light chain variable region leader sequence (for KoH-bodies) and a 3' primer specific for mouse heavy chain constant region, to form an amplicon. The amplicons were then amplified again by PCR using a 5' degenerate primer set specific for framework 1 of human IgG heavy chain variable region sequence and a 3' degenerate primer set specific for framework 4 of human IgG heavy chain variable region sequence (for antibodies) or a 5' degenerate primer set specific for framework 1 of human kappa light chain variable region sequence and a 3' degenerate primer set specific for framework 4 of human kappa light chain variable region sequence (for KoH-bodies). The other set of the resulting RT products was first amplified by PCR using a 5' degenerate primer specific for human kappa light chain variable region leader sequence and a 3' primer specific for mouse kappa light chain constant region to form an amplicon. The amplicon was then amplified again by PCR using a 5' degenerate primer set specific for framework 1 of human kappa light chain variable region sequence and a 3'

degenerate primer set specific for framework 4 of human kappa light chain variable region sequence. The heavy chain and light chain derived PCR products were cloned into expression vectors containing human IgG4 heavy chain constant region and kappa light chain constant region, respectively. Recombinant anti-MBG antibodies and KoH-bodies were produced in CHO cells after stable transfection with paired expression plasmids containing heavy chain and light chain derived from the same B cell. The Fab fragments of KoH-body H4H14410P and the antibody 3E9 were cloned and expressed in the same manner. Antibodies, KoH-bodies, and Fabs secreted into conditioned culture media by the transfected cells were purified by Protein A or KappaSelect (GE Life Sciences) affinity chromatography.

### **Biophysical Characterization of KoH-bodies**

***SPR measurements of anti-marinobufagenin (MBG) mAbs and mKoH-bodies.*** Surface plasmon resonance (SPR) experiments were performed on a Biacore 2000 instrument using a dextran-coated (CM5) chip at 25°C. The running buffer was filtered PBS (8.1mM Na<sub>2</sub>HPO<sub>4</sub>, 1.9mM NaH<sub>2</sub>PO<sub>4</sub>, 2.7mM KCl, 137mM NaCl, 0.1% v/v DMSO, adjusted to pH7.4). A capture sensor surface was prepared by covalently immobilizing recombinant Protein A (Pierce, Rockford, IL) to the chip surface using (1Ethyl-3-[3-dimethylaminopropyl]carbodiimide hydrochloride)/N-hydroxysuccinimide (EDC/NHS) coupling chemistry. Following surface activation, Protein A in coupling buffer (0.1 M acetate buffer, pH 4.5) was injected over the activated chip surface until a resonance unit (RU) signal of about 2000 RU was reached. The activated coupled chip surfaces were then washed and treated with 10 mM glycine-HCl, pH 1.5, to remove uncoupled residual Protein A. Anti-MBG mAbs and KoH-bodies were diluted into the running buffer and captured ~8,500 – 12,000 RU on the coupled Protein A chip surface. Following the capture step, a range of MBG concentrations (270.0 μM to 13.7 nM) were injected over the different anti-MBG mAb/mKoH-body captured surfaces. Association rate constant ( $k_a$ ) was determined from data obtained at multiple ligand concentrations, while the dissociation rate constant ( $k_d$ ), which is independent of test ligand concentration, was determined from the change in anti-MBG bound test ligand RU over time (~5 minutes) for MBG ligands. Specific Biacore kinetic sensorgrams were obtained by a double referencing procedure as described [6]. The data were then processed and kinetic analyses performed using Scrubber software (version 2.0,

BioLogic Software). The equilibrium dissociation constant ( $K_D$ ) was calculated from the ratio of the dissociation rate constant divided by the association rate constant ( $K_D = k_d/k_a$ ).

***Isothermal titration calorimetry (ITC) measurements of anti-MBG mAbs and mKoH-bodies.***

Binding affinities ( $K_D$ 's) in ITC are derived from sequential measurements of the heat production involved in titration of antigen (MBG) to antibody/KoH-body (anti-MBG).  $K_D$  is calculated from the slope of the resulting binding isotherm since heat production is directly proportional to amount of antigen bound. Enthalpy ( $\Delta H$ ) associated with binding interaction is measured as the accumulated heat over the course of titration and the binding stoichiometry (N) is determined from the inflection point in the binding isotherms. Free energy ( $\Delta G$ ) and entropy ( $\Delta S$ ) of binding are calculated from the  $K_D$  using the equations,  $\Delta G = -RT/\ln K_D$ , where R is the gas constant and T is the absolute temperature and  $\Delta S = (\Delta H - \Delta G)/T$ . Anti-MBG antibodies/KoH-bodies were dialyzed in degassed PBS (0.01M  $\text{Na}_2\text{HPO}_4/\text{NaH}_2\text{PO}_4$ , 0.15M NaCl, pH7.4) and diluted to a final concentration of 10  $\mu\text{M}$  in titration buffer (PBS with 1.6% DMSO). Antibody/KoH-body stock concentrations were determined at 280 nm and concentrations determined using extinction coefficients calculated from anti-MBG antibody/KoH-body sequences. For MBG preparation, a 25 mM stock solution of DMSO was diluted to 150  $\mu\text{M}$  in PBS. Final concentration of DMSO was adjusted to 1.6% for all MBG solutions to match the titration buffer (PBS with 1.6% DMSO).

Binding affinities ( $K_D$ 's) of MBG and related glycosides to anti-MBG monoclonal antibodies/KoH-bodies were determined using a MicroCal 200 Auto Isothermal Titration Calorimeter (GE Healthcare) at 25°C. Titrations were performed with 15-fold excess of titrant for MBG or 20-fold excess of titrant for other glycosides via syringe, by injections (2  $\mu\text{L}$  in 4 seconds) into the anti-MBG antibody/KoH-body cell with a stirring speed of 750 rpm. Reference power and intervals between injections were set at 6-10  $\mu\text{cal}/\text{second}$  and 180 seconds. ITC-customized Origins 7.0 software was used to analyze data and resulting binding isotherms were fitted using a one-site model.

***Isoelectric point determination.*** The isoelectric point (pI) determination and charge variant profiling of anti-MBG antibodies/KoH-bodies was performed by imaged capillary isoelectric

focusing using a iCE3 analyzer equipped with Alcott 720 NV autosampler (ProteinSimple, San Jose, CA). The catholyte tank was filled with 0.1 M sodium hydroxide in 0.1% methyl cellulose and the anolyte tank was filled with 0.08 M phosphoric acid in 0.1% methyl cellulose.

Antibodies/KoH-bodies were focused at 1500 V for 1 min and then at 3000 V for 7 min. Focused protein bands were detected by UV absorbance at 280 nm. The electropherograms were exported and processed in Empower 3 software (Waters Corp., Milford, MA, USA). Samples applied to the iCE3 analyzer contained a basic pI marker, an acidic pI marker, pharmalyte 3-10, 2M urea and 0.5 mg/mL of protein.

***Thermal analysis by differential scanning calorimetry.*** The unfolding or denaturation ( $T_m$ ) temperatures for VI antibodies and KoH-bodies were measured by differential scanning calorimetry (DSC). Antibodies/KoH-bodies were diluted to 1 mg/mL in reference buffer (10 mM histidine, pH 5.5). Diluted samples and buffer reference were degassed and equilibrated for 5 min at 10°C. Following degassing, samples were subjected to a temperature ramp at a scan rate of 90°C/hour to a maximum of 105°C on a MicroCal VP-DSC Capillary Cell MicroCalorimeter (Malvern Instruments, Westborough, MA, USA). Baseline correction and concentration normalization was applied to all data. Origin 7 (OriginLab, Northampton, MA) software was used to fit data to a No 2-State model (two transitions) to determine  $T_m$  values.

***Solubility and viscosity studies of antibodies and KoH-bodies.*** KoH-bodies or mAb (50-52 mg/mL) in sample buffer (10mM histidine, pH 5.5) were added to Amicon ultra centrifugal filter tubes (Ultracel-30K) at room temperature. The filter tubes were centrifuged in a tabletop centrifuge at 7000 rcf for 30 min. Samples were then centrifuged for an additional 30 min at 7000 rcf or until no further reduction in volume was observed. Concentration of KoH-body or mAb in the supernatant was determined by measuring absorbance of the undiluted sample at 280 nm using a SoloVPE Slope Spectrophotometer (C Technologies, Bridgewater, NJ, USA). KoH-bodies or mAb at high concentration (>175 mg/ml) due to ultracentrifugation were diluted to the appropriate concentrations using sample buffer (10 mM histidine, pH 5.5). Viscosities were measured at 20°C using a m-VROC viscometer (Rheosense Inc, San Ramon, CA, USA). Reduction in viscosity by the addition of viscosity reducing agent was also evaluated at high antibody concentration (175 mg/mL).



**Agitation and Stability studies.** KoH-bodies or mAb at 10 mg/mL in Type I glass vials were agitated on an orbital shaker (250 rpm, Chemglass Life Sciences, IS-500 Incubator Shaker) at room temperature for 24 to 48 hr with or without the presence of a non-ionic surfactant. Soluble aggregates were analyzed by size-exclusion ultra-high performance chromatography (SE-UPLC). Chromatograms were integrated and processed in Empower 3 software (Water Corp, Milford, MA, USA).

### **Methods to make Marinobufagenin (SI Appendix, Fig. S7):**

#### **General Methods:**

<sup>1</sup>H NMR spectra were recorded on a Varian Inova 300 or 500 MHz NMR instrument.

Chromatographic purities were determined on an Agilent 1200 Series or 1100 Series LC/MS system using a Merck Chromolith RP-18e analytical HPLC column (monolithic, 50 × 2 mm) and the following analytical HPLC method: injection volume 5 μL; flow rate 1 mL/min; 5→95% acetonitrile in water with 0.05% AcOH over 5 mins; Agilent diode array detector at λ= 254, 220 or 195 nm; room temperature.

#### **14-Olefin (3)**

A solution of Telocinobufagin (200 mg, 0.49 mmol) in MeOH (35 mL) and 35% hydrochloric acid (0.04 mL) was heated at reflux for 17 hrs. The reaction mixture was poured into ice-water (30 mL) and extracted with CHCl<sub>3</sub>. The organic layer was then washed with brine, dried over Na<sub>2</sub>SO<sub>4</sub>, filtered, and concentrated on a rotary evaporator and evaporated to dryness via the use of a rotary evaporator. The crude residue was purified via column chromatography (40g, SiO<sub>2</sub>, RediSep column) using a gradient of 0 → 50% EtOAc in hexanes, over 40 min. The desired product was obtained in 57% yield (110 mg, 0.29 mmol). LC/MS: retention time 2.93 min. (ESI) C<sub>24</sub>H<sub>32</sub>O<sub>4</sub> calculated for [M+H]<sup>+</sup> 385; found 385.

#### **3β-Acetate (2)**

To a round bottomed flask containing 14-Olefin (3) (80.0 mg, 0.20 mmol) and a stir bar, was added acetic anhydride (1.35 mL) and pyridine (1.8 mL). The reaction mixture was allowed to stir overnight at room temperature. Upon completion of the reaction (as determined by LCMS),

the reaction mixture was directly loaded onto a pre-equilibrated silica column and eluted with a gradient of 0 → 100% EtOAc in hexanes. The desired 3β-Acetate (**2**) was isolated in 95% yield (86 mg, 0.20 mmol). LC/MS: retention time 3.20 min. (ESI) C<sub>26</sub>H<sub>34</sub>O<sub>5</sub> calculated for [M+H]<sup>+</sup> 427; found 427.

### ***Marinobufagenin (1)***

To a solution of 3β-Acetate (**2**) (60.0 mg, 0.14 mmol), in acetone (3.2 mL), was added a solution of NIS (1.9 equiv, 60.0 mg, 0.267 mmol) in acetone/water (1:1, 4.0 mL). The resultant solution was stirred at room temperature overnight. Upon complete formation of the desired iodohydrin (as determined by LCMS), K<sub>2</sub>CO<sub>3</sub> (20 equiv) was added and the mixture was stirred at room temperature for an additional 17 hrs. Despite the reaction not achieving full conversion to the desired product, the reaction mixture was diluted with water and extracted with CHCl<sub>3</sub> (3x30 mL), dried over Na<sub>2</sub>SO<sub>4</sub>, filtered, and concentrated on a rotary evaporator. The crude residue was purified via column chromatography (40g, SiO<sub>2</sub>, RediSep column) using a gradient of 0 → 100% EtOAc in hexanes, over 40 min. The desired product was obtained in 40% yield (23 mg, 0.0575 mmol). LC/MS: retention time 2.63 min. (ESI) C<sub>24</sub>H<sub>32</sub>O<sub>5</sub> calculated for [M+H]<sup>+</sup> 401; found 401.

### ***In vivo characterization of KoH-bodies***

***Mouse PK studies of KoH-bodies.*** The pharmacokinetic clearance rates of anti-MBG KoH-bodies and VI mAbs were determined in C57BL/6 mice (Taconic Biosciences). Cohorts contained five mice per test article and all mice received a single sub-cutaneous (1 mg/kg) dose. Blood samples were collected at 6 hours, 1, 2, 3, 4, 8, 11, 15, 21, 30, and 49 days post-dosing. Circulating drug levels were determined by total human antibody analysis using an ELISA immunoassay. Briefly, a goat anti-human IgG polyclonal antibody (Jackson ImmunoResearch Laboratory) was coated onto a 96-well Maxisorb plate (VWR) in order to capture the human IgG present in the sera. Plates were coated at 4°C overnight, followed by non-specific blocking by BSA (Sigma). The serum samples containing test articles were plated using a six-dose serial dilution and the reference standards of the dosed test articles were plated in 12-dose serial dilution and incubated for one hour at room temperature. Following a washing step, the plate bound antibodies were detected using a goat anti-human IgG polyclonal antibody conjugated with horseradish peroxidase (Jackson ImmunoResearch Laboratory) and incubated for one hour

at room temperature followed by development with a colorimetric substrate such as BD OptEIA (BD Biosciences). After the reaction was stopped with 1M phosphoric acid, optical absorptions at 450 nm were recorded. Drug antibody/KoH-body concentrations in the sera were calculated based on the reference standard curves generated using GraphPad Prism software.

Pharmacokinetic parameters (elimination half-life, time of maximum concentration, maximum concentration and bioavailability) were calculated from the serum concentration-time data using non-compartmental analysis by Phoenix WinNonLin software (Pharsight).

***Immunogenicity.*** VI mice were immunized with a prime at day 0 and a boost one week later without adjuvant with KoH-bodies against Targets C and D, a VI antibody with a human variable domain and a mouse Fc to protein E, and a mouse antibody with a mouse variable domain and a mouse Fc to protein F as immunogens via foot pad route. Pre-immune and immune sera were collected at days 7, 14, 21 following immunization. Immune responses were determined by ELISA using the respective immunogens as coating antigens. Anti-sera were diluted 1:300 with further 3-fold serial dilutions. IgM and IgG specific antibody responses were detected as indicated with HRP conjugated anti-mouse IgM or a cocktail of HRP conjugated anti-mouse IgG isotypes, excluding the isotype of the coating antigen. Anti-IgG isotype-HRP corresponding to each immunogen was used as positive control.

### **Crystallization and structure determination**

***Crystallization and structure determination of KoH Fab:MBG complex.*** The Fab fragment of a KoH-body (H4H14401P) was mixed with synthetic MBG in a 3:1 molar excess of MBG over Fab. Initial crystallization trials with the H4H14401P Fab:MBG complex were not successful, so an additional Fab (known to bind hCK, which is present on the light chain of the KoH Fab) was added to the complex. A 1:1 complex of the two Fabs was purified by size-exclusion chromatography, and MBG was added to this complex in a 3:1 molar excess of MBG over H4H14401P Fab. Diffraction-quality crystals of the 2 Fab + MBG complex grew in conditions containing 0.8 M ammonium sulfate and 0.1 M sodium citrate pH 5. These crystals were cryoprotected using 20% (v/v) ethylene glycol and cryo-cooled in liquid nitrogen. Data to 3.6 Å were collected at beamline 5.0.2 of the Advanced Light Source (Berkeley, CA). The structure was determined by molecular replacement [7] using Fab subdomains with high sequence identity

from PDB codes 4YHY, 5DQD, 4LRN, 1EEQ, and 4WCY. The C-terminal regions of the anti-kappa antibody (CK and CH1) are not particularly well ordered in this structure, since there are no stabilizing crystal contacts for this domain. This is reflected in the higher temperature factors for this portion of this Fab. The N-terminal domains of the anti-kappa antibody (VK and VH) are well ordered, and the CDR interaction surface between this Fab and the KoH Fab is clearly defined in the electron density. Once the two-Fab structure had been well refined, the difference electron density for MBG was clear, allowing placement and refinement of MBG molecules (SI Appendix, Fig. S10A,B). In addition to the primary bound MBG molecule depicted in Fig. 7A, a second MBG molecule sits nearby, making a crystal contact between the CDR surface of one KoH Fab and the C<sub>K</sub> domain of a second KoH Fab. This second MBG molecule is most likely a crystal packing artifact, since it buries almost as much surface with the symmetry-related molecule as with the primary molecule (185 Å<sup>2</sup> and 193 Å<sup>2</sup> respectively) and our ITC experiments showed no more than one MBG bound per Fab arm of H4H14401P (SI Appendix, Table S6). We have chosen not to depict the second MBG in Figs. 7 and S7, but show it in Fig S9 for completeness (SI Appendix). All refinement was carried out using Refmac5 [8].

***Crystallization and structure determination of comparator Fab:MBG complex.*** The Fab fragment of the 3E9 comparator antibody [9], expressed and purified as described above, was mixed with synthetic MBG in a 3:1 molar excess of MBG over Fab. In contrast to the KoH Fab, this conventional Fab crystallized readily in 0.2 M ammonium sulfate, 20% polyethylene glycol 3350. These crystals were cryoprotected using 20% (v/v) PEG 400 and cryo-cooled in liquid nitrogen. Data to 1.9 Å were collected at beamline 5.0.2 of the Advanced Light Source (Berkeley, CA). The structure was determined by molecular replacement using Fab subdomains with high sequence identity from PDB code 4PUB. As with the KoH Fab structure, the electron density for the bound MBG in this structure was clear (SI Appendix, Fig. S10C,D), permitting the molecule to be placed and refined with high confidence. Crystal structure data has been deposited in the PDB, with accession codes 6PYC (KoH antibody Fab + MBG) and 6PYD (3E9 antibody Fab + MBG).

1. Macdonald, L.E., et al., *Precise and in situ genetic humanization of 6 Mb of mouse immunoglobulin genes*. Proc Natl Acad Sci U S A, 2014. **111**(14): p. 5147-52.

2. Valenzuela, D.M., et al., *High-throughput engineering of the mouse genome coupled with high-resolution expression analysis*. Nat Biotechnol, 2003. **21**(6): p. 652-9.
3. Poueymirou, W.T., et al., *F0 generation mice fully derived from gene-targeted embryonic stem cells allowing immediate phenotypic analyses*. Nat Biotechnol, 2007. **25**(1): p. 91-9.
4. Bagrov, A.Y., et al., *Plasma marinobufagenin-like and ouabain-like immunoreactivity during saline volume expansion in anesthetized dogs*. Cardiovasc Res, 1996. **31**(2): p. 296-305.
5. Wang, X. and B.D. Stollar, *Human immunoglobulin variable region gene analysis by single cell RT-PCR*. J Immunol Methods, 2000. **244**(1-2): p. 217-25.
6. Myszka, D.G., *Improving biosensor analysis*. J Mol Recognit, 1999. **12**(5): p. 279-84.
7. McCoy, A.J., et al., *Phaser crystallographic software*. J Appl Crystallogr, 2007. **40**(Pt 4): p. 658-674.
8. Murshudov, G.N., et al., *REFMAC5 for the refinement of macromolecular crystal structures*. Acta Crystallogr D Biol Crystallogr, 2011. **67**(Pt 4): p. 355-67.
9. Fedorova, O.V., et al., *Monoclonal antibody to an endogenous bufadienolide, marinobufagenin, reverses preeclampsia-induced Na/K-ATPase inhibition and lowers blood pressure in NaCl-sensitive hypertension*. J Hypertens, 2008. **26**(12): p. 2414-25.

Fig S1

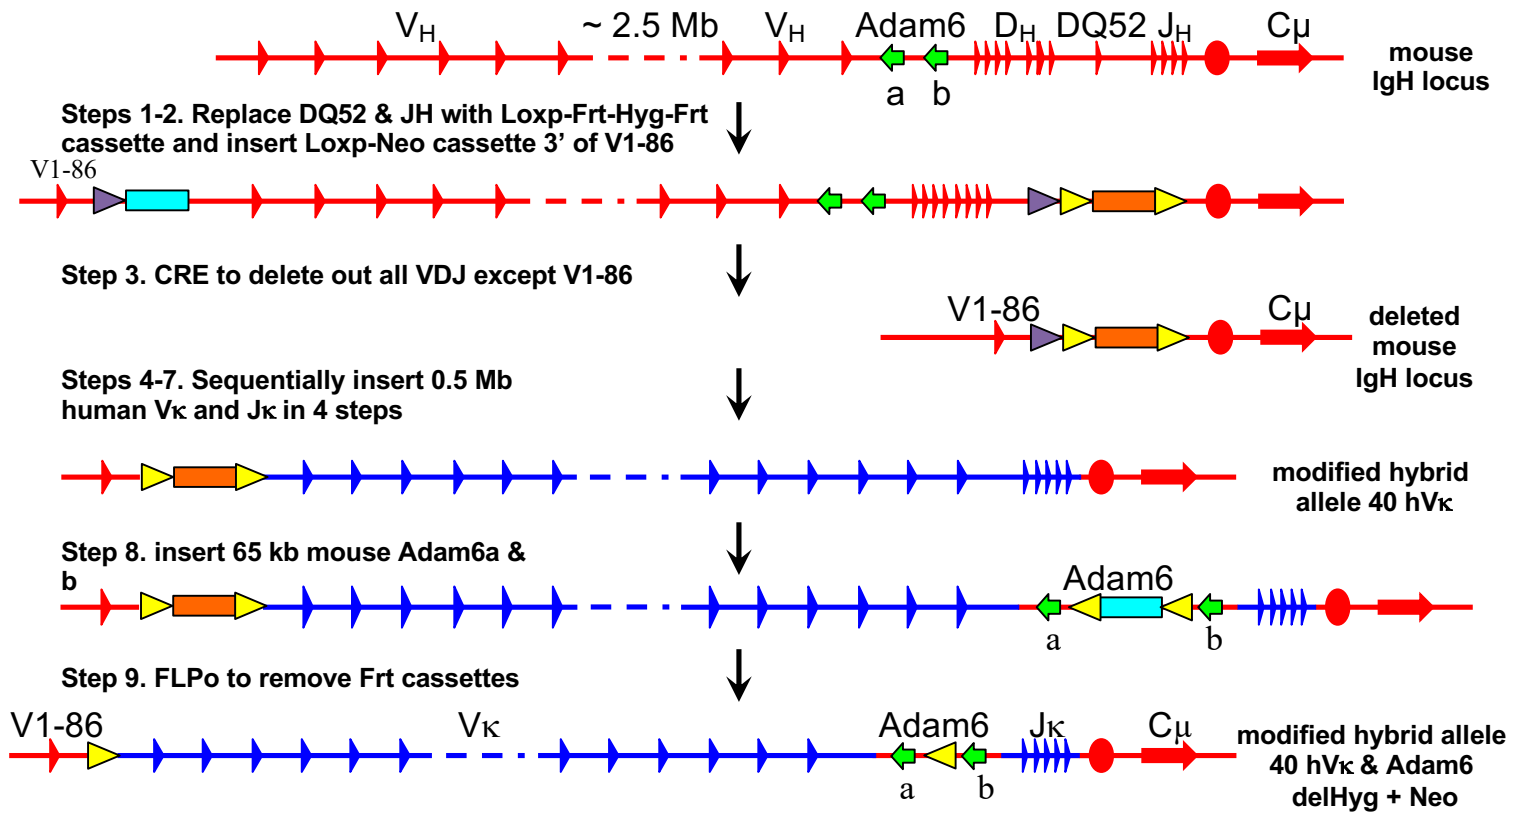

**Figure S1.** Detailed scheme for genomic replacement of mouse IgH V, D, and J segments with human IgK V and J segments. Steps 1-3: CRE-mediated deletion of 1.5 Mb containing all of the V, D, and J segments of the mouse Ig heavy chain locus. Steps 4-7: Sequential insertion of 0.5 Mb of human Ig Kappa sequence containing 40 V and 5 J segments. Step 8: insertion of 65 kb of mouse sequence containing the Adam6a and 6b genes required for male fertility. Step 9: FLPo-mediated deletion of the cassettes. Mouse IgH sequences are in red, human IgK sequences are in blue, red ovals indicate the mouse IgH intronic enhancer, green arrows indicate the mouse Adam6a and 6b genes, orange rectangles indicate Hygromycin selection cassettes, cyan rectangles indicate Neomycin selection cassettes, yellow triangles indicate Frt sites, and purple triangles indicate Loxp sites.

# Table S1

Table S1. Replacement of mouse IgH V, D, and J genes with human IgK V and J genes

| Modified allele name   | Amount human sequence (kb) | Human genome coordinates(GRCh37)                                                     | Size of targeting construct (kb) | Percentage of total hVK use | Total V segments | No. of ES cell steps |
|------------------------|----------------------------|--------------------------------------------------------------------------------------|----------------------------------|-----------------------------|------------------|----------------------|
| IgH-PC                 | 0                          |                                                                                      | 99                               |                             |                  | 1                    |
| IgH-DC                 | 0                          |                                                                                      | 74                               |                             |                  | 2                    |
| IgH-cre                | 0                          |                                                                                      |                                  |                             |                  | 3                    |
| 6hVKoH                 | 110                        | 2:89,159,668-88,270,090                                                              | 148                              | 14                          | 6                | 4                    |
| 16hVKoH                | 250                        | 2:89,238,925-89,410,078                                                              | 201                              | 47                          | 16               | 5                    |
| 30hVKoH                | 390                        | 2:89,388,839-89,549,402                                                              | 190                              | 70                          | 30               | 6                    |
| 40hVKoH                | 480                        | 2:89,881,248-89,890,737; 2:89,487,788-89,630,436                                     | 182                              | 100                         | 40               | 7                    |
| 40hVKoH+Adam6          | 480                        | 2:89,881,248-89,890,737; 2:89,487,788-89,630,436 ( $\Delta$ 2:89,167,390-89,168,129) | 158                              | 100                         | 40               | 8                    |
| 40hVKoH+Adam6 dHyg+Neo | 480                        | 2:89,881,248-89,890,737; 2:89,487,788-89,630,436 ( $\Delta$ 2:89,167,390-89,168,129) |                                  | 100                         | 40               | 9                    |

The KoH locus was made in nine sequential steps in F1H4 ES cells. The mouse IgH variable region locus was deleted in three sequential steps. The human IgK variable region locus was inserted in four sequential steps. The mouse Adam6a and 6b genes were inserted into the human Vk-Jk intergenic region, replacing human 2:89,167,390-89,168,129 (740 bp) with mouse 12:114,720,456-114,785,235 (64,779 bp, NCBI37/mm9 genome coordinates). A frt'd neo cassette was inserted between the two Adam6 genes at mouse genome coordinate 12:114,777,439. In the final step, transient Flp recombinase expression was used to delete the upstream Frt-Hyg-Frt cassette and the Frt-Neo-Frt cassette in Adam6. Amount of human sequence is the cumulative amount added for each allele. Note that the first 9490bp of the 40hVKoH allele map to 2:89,881,248-89,890,737 on the + strand just 5' of IGKV2D-40 (100% match). After the first 9490bp, beginning at IGKV2-40, the sequence matches 2:89,487,788-89,630,436 on the - strand as expected.

# Table S2. BACvec construction

Table S2. BACvec construction

| BACvec                     | Step | Description                                                                                                                                                                                           | Cassette                                                                                                                                                    | Recipient BAC | Process  | Product name                | Drug selection |
|----------------------------|------|-------------------------------------------------------------------------------------------------------------------------------------------------------------------------------------------------------|-------------------------------------------------------------------------------------------------------------------------------------------------------------|---------------|----------|-----------------------------|----------------|
| PC                         | 1    | cassette at proximal end of mlgH locus                                                                                                                                                                | [5'mlgHp up homology/3'mlgHp up homology XmaI]-loxp-frt-pgk-em7-hyg-frt-[5'down mlgHp AvrII/3'down homology mlgHp]                                          | CT7-302a07    | BHR      | VI1/1045                    | hyg cm         |
| DC                         | 1    | cassette at distal end of mlgH locus                                                                                                                                                                  | [mlgH dist 5' up-2/3' up mlgHd NotI]-loxp-pgk-em7-neo-loxp-[5' mighd 80kb down HindIII/3' mlgHd 80kb down]                                                  | CT7-253i20    | BHR      | VI243/1593                  | kan cm         |
| 6hVK on IgH                | 1    | Replace CM of pBelo with PGK-Neo-PI-SceI                                                                                                                                                              | [3' pbelo del cm/5' pbelo del cm NsiI]-loxp-pgk-em7-neo-PI-SceI-[5' 302a07 Apal (m56)/3' 302a07 (m57b)]                                                     | CT7-302a07    | BHR      | VI109                       | kan            |
|                            | 2    | Replace loxp of pBelo with CM-I-CeuI                                                                                                                                                                  | [5' 302 a07 (m53)/3' 302a07 NsiI (m54)]-Em7-CM-I-CeuI-[3' pbelo del loxp AvrII/5' pbelo del loxp ]                                                          | VI109         | BHR      | VI111                       | kan cm         |
|                            | 3    | Delete pgk-neo-PI-SceI plus 69kb of mlgH from 5' end, replace with Spec-PI-SceI. Leaves ~8kb proximal mlgH arm.                                                                                       | [3' pbelo del cm/5' pbelo del cm Apal]-Spec-PI-SceI-[5' mlgHp down HindIII (3d)/3' down homology mlgHp]                                                     | VI111         | BHR      | VI158                       | spec cm        |
|                            | 4    | Ligate distal mlgH homology arm onto proximal hlgK 1167                                                                                                                                               | VI76: NotI-20kb of mouse sequence upstream of mlgH locus-frt-UbCp-em7-hyg-frt-Ascl                                                                          | 1167          | Ligation | VI157                       | hyg spec       |
|                            | 5    | Ligate proximal mlgH homology arm onto proximal hlgK                                                                                                                                                  | VI158: PI-SceI-8kb of mouse sequence downstream of IgH4-em7-cm-I-CeuI                                                                                       | VI157         | Ligation | VI159/1430                  | hyg cm         |
|                            | 6    | Replace frt-UbCp-em7-hyg-frt cassette with equivalent neo version                                                                                                                                     | VI63: NotI-20kb of mouse sequence upstream of mlgH locus-frt-UbCp-em7-neo-frt-Ascl                                                                          | VI159         | Ligation | VI295/6hVKoH                | kan cm         |
| 16hVK on IgH               | 1    | Ligate distal mlgH homology arm onto 16hVK (VI75/1182)                                                                                                                                                | VI63: NotI-20kb of mouse sequence upstream of mlgH locus-frt-UbCp-em7-neo-frt-Ascl                                                                          | VI75/16hVK    | Ligation | VI197                       | kan spec       |
|                            | 2    | Replace frt-UbCp-em7-neo-frt cassette with equivalent hyg version                                                                                                                                     | frt-UbCp-em7-hyg-frt                                                                                                                                        | VI197         | BHR      | VI327/16hVKoH               | hyg spec       |
| 30hVK on IgH               | 1    | Ligate distal mlgH homology arm onto 30hVK (VI82/1205)                                                                                                                                                | VI76: NotI-20kb of mouse sequence upstream of mlgH locus-frt-UbCp-em7-hyg-frt-Ascl                                                                          | VI82/30hVK    | Ligation | VI198                       | hyg spec       |
|                            | 2    | Replace frt-UbCp-em7-hyg-frt cassette with equivalent neo version                                                                                                                                     | frt-UbCp-em7-neo frt                                                                                                                                        | VI198         | BHR      | VI328/30hVKoH               | kan spec       |
| 40hVK on IgH               | 1    | Ligate distal mlgH homology arm onto 40hVK (1242)                                                                                                                                                     | VI63: NotI-20kb of mouse sequence upstream of mlgH locus-frt-UbCp-em7-neo-frt-Ascl                                                                          | 1242/40hVK    | Ligation | VI199                       | kan spec       |
|                            | 2    | Replace frt-UbCp-em7-neo-frt cassette with equivalent hyg version                                                                                                                                     | frt-UbCp-em7-hyg-frt                                                                                                                                        | VI199         | BHR      | VI329/40hVKoH               | hyg spec       |
| 40hVK on IgH + mouse Adam6 | 1    | Replace 3' CM of CT7-929d24 with Spec cassette flanked by 5' PI-SceI and 3' I-CeuI sites                                                                                                              | [5' 929d24 (m60)/3' 929d24 XbaI (m59)]-PI-SceI-Spec-I-CeuI-[5' pbelo del cm Ascl/3' pbelo del cm]                                                           | CT7-929d24    | BHR      | VI108                       | spec           |
|                            | 2    | Replace ~14.5 kb of 5' end of VI108 with NotI-Pgk-em7-hyg-polyA-Hsvp-tk-Ascl cassette                                                                                                                 | [5' pbelo del loxp /3' pbelo del loxp NotI]-pgk-em7-hyg-polya-hsvp- VI108 tk-[5' 929d24 Ascl (m78b)/3' 929d24 (m79)]                                        | VI108         | BHR      | VI120                       | hyg spec       |
|                            | 3    | NotI + Ascl ligation to replace NotI-I-CeuI-Pgk-em7-hyg-polyA-Hsvp-tk-Ascl cassette with 20kb mouse IgH distal homology arm                                                                           | VI63: NotI-20kb of mouse sequence upstream of mlgH locus-frt-UbCp-em7-neo-frt-Ascl                                                                          | VI120         | Ligation | VI121                       | kan spec       |
|                            | 4    | Replace neo in 5' pgk-em7-neo-polya-PI-SceI cassette with hyg                                                                                                                                         | [pgk-em7]-hyg-[polya]                                                                                                                                       | VI111         | BHR      | VI124                       | hyg cm         |
|                            | 5    | PI-SceI + I-CeuI ligation to replace the 3' Spec cassette of VI121 with a 77 kb fragment of CT7-302a07 containing the mouse Adam6b, DH, JH, and IgM genes. PI-SceI site is 5.5 kb from end of Adam6b. | VI124: PI-SceI-77 kb from CT7-302a07-cm-I-CeuI                                                                                                              | VI121         | Ligation | VI122                       | kan cm         |
|                            | 6    | Replace 5' distal mlgH arm, frt-UbCp-em7-neo-frt cassette, and ~44kb of mlgH sequence with loxp-spec-loxp cassette and I-CeuI site. I-CeuI is 751bp downstream of Adam6a gene.                        | [5' pbelo del loxp/3' pbelo del loxp SacI]-loxp-spec-loxp-[5' 929d24 Xba-I-CeuI (md90c)/3' 929d24 mlgH (md90)]                                              | VI122         | BHR      | VI148                       | spec cm        |
|                            | 7    | CRE to delete loxp-spec-loxp cassette                                                                                                                                                                 | none                                                                                                                                                        | VI148         | CRE      | VI149                       | cm             |
|                            | 8    | Replace CM plus ~62kb from 3' end of VI149 (mouse DH, JH, and IgM) with Ascl site and Spec cassette                                                                                                   | [5' up VI149 (m56)/3' up VI149 Ascl-EcoRI (m57b)]-spec-[5' pbelo del cm AvrII/3' pbelo del cm]                                                              | VI149         | BHR      | VI413                       | spec           |
|                            | 9    | Insert frt-UbCp-em7-neo-frt cassette ~47kb downstream of Adam6b and ~4.8kb upstream of Adam6a                                                                                                         | [5' up mAdam6/3' up mAdam6 AsiSI-AgeI]-frt-neo-UbCp-em7-frt-[5' down2 mAdam6 AsiSI-KpnI/3' down2 mAdam6]                                                    | VI413         | BHR      | VI422                       | kan spec       |
|                            | 10   | Replace 5' distal mlgH homology arm, frt-UbCp-em7-neo-frt cassette, and ~35kb of human IgK of VI295 with em7-hyg cassette                                                                             | [3' pbelo del cm/5' pbelo del cm MfeI]-em7-hyg-[5' down 1708 FseI-BamHI (h34b)/3' down 1708 (h35)]                                                          | VI295/6hVKoH  | BHR      | VI414                       | hyg cm         |
|                            | 11   | Replace 3' CM with Spec cassette                                                                                                                                                                      | [5' 302 a07 (m53)/3' 302a07 NsiI (m54)]-spec-[3' pbelo del loxp AvrII/5' pbelo del loxp]                                                                    | VI414         | BHR      | VI425                       | hyg spec       |
|                            | 12   | Replace 740bp of hlgK V-J intergenic region (~17kb downstream of IgKV4-1 and ~7kb upstream of IgKJ1) with CM cassette flanked by I-CeuI and Ascl sites                                                | [5' up hlgK V-J short del (h43)/3' up hlgK V-J short del AvrII (h44)]-I-CeuI-CM-[5' down hlgK short del Ascl-BamHI (h46b)/3' down hlgK V-J short del (h47)] | VI425         | BHR      | VI426                       | hyg cm spec    |
|                            | 13   | Replace CM cassette in hlgK V-J intergenic region with ~68kb Adam6a-frt-UbCp-em7-neo-frt-Adam6b cassette (GRCm37 coordinates 12:114,720,456-114,785,235)                                              | VI422: Ascl-9.6kb Adam6b-47.5kb intergenic region-frt-UbCp-em7-neo-frt-7.8kb Adam6a-I-CeuI                                                                  | VI426         | Ligation | VI428/40hVKoH + mouse Adam6 | hyg kan spec   |



# Table S3. BACvec primers

Table S3. BACvec primers

| MAID        | Step                                     | Name                                     | Sequence                                                  |
|-------------|------------------------------------------|------------------------------------------|-----------------------------------------------------------|
| mIgH-PC     | 1                                        | 5'mIgHp up homology                      | CCAGCAATCATGGTGGGTGTC                                     |
|             |                                          | 3'mIgHp up homology xmai                 | CCTCCCGGGGATATGTGTTTTGATGCTT                              |
|             |                                          | 5'down mIgHp avrII                       | CCTAGGCTGAGCATTGCAGACTAATC                                |
|             |                                          | 3'down homology mIgHp                    | CCCTATGCATCGGATACTGT                                      |
| mIgH-DC     | 1                                        | mIgH dist 5' up-2                        | CTATGGGATAACAATTCCTCAG                                    |
|             |                                          | 3' up mIgHd not                          | GTTTCATGGCGCGCCGTAGAATCAGTGTCTTCAGGGA                     |
|             |                                          | 5' mighd 80kb down hindiii               | CACCTGGAAGCTTATCACTGGATCCTGAGTGACCA                       |
|             |                                          | 3' mIgHd 80kb down                       | TACATGCTTGTGCATTCTGAT                                     |
| 6hVK        | 1                                        | 3' pbelo del cm                          | CAATCCAGGCTCTGACCGTTC                                     |
|             |                                          | 5' pbelo del cm Nsil                     | CTGTCATGCATGCCCGGTAGTGATCTTATTTT                          |
|             |                                          | 5' 302a07 Apal (m56)                     | CCTCGGGCCCTTGCTCTGTAGTAAAGCTTTA                           |
|             |                                          | 3' 302a07 (m57)                          | TAATAAGGAAGTGAAGATC                                       |
|             | 2                                        | 3' 302a07 (m57b)                         | TGGCTGTCTTGCCAAAAGGAA                                     |
|             |                                          | 5' 302a07 (m53)                          | AGGCCACGAGGCCCTGCCACA                                     |
|             |                                          | 3' 302a07 Nsil (m54)                     | CCTCATGCATGAGTTCACACACAAGGAGGAA                           |
|             |                                          | 3' pbelo del loxp AvrII                  | CCTCCCTAGGCTCGCTTTTCCAGCACCTGTCGT                         |
|             | 3                                        | 5' pbelo del loxp                        | ATCCGATGCAAGTGTGTCGCT                                     |
|             |                                          | 3' pbelo del cm                          | CAATCCAGGCTCTGACCGTTC                                     |
|             |                                          | 5' pbelo del cm Apal                     | GCTGCGGGCCCGCCCGGTAGTGATCTTATTTT                          |
|             |                                          | 5' mlgHp down hind3 (3d)                 | CTGCTAAGTCTTCTGAGCATTGCAGACTAATC                          |
| 40hVK-Adam6 | 1                                        | 3' down homology mIgHp                   | CCCTATGCATCGGATACTGT                                      |
|             |                                          | 5' 929d24 (m60)                          | CCACTTCTCCTCTATAAGTT                                      |
|             |                                          | 3' 929d24 XbaI (m59)                     | CCTCTCTAGATTGTGATAAAAACTGCATGGTA                          |
|             |                                          | 5' pbelo del cm AscI                     | CCTAGGCGCGCCCGCCGGTAGTGATCTTATTTT                         |
|             | 2                                        | 3' pbelo del cm                          | CAATCCAGGCTCTGACCGTTC                                     |
|             |                                          | 5' pbelo del loxp                        | ATCCGATGCAAGTGTGTCGCT                                     |
|             |                                          | 3' pbelo del loxp NotI                   | CCTCTGCGGCCCGCTCGCTTTTCCAGCACCTGTCGT                      |
|             |                                          | 5' 929d24 AscI (m78b)                    | CCTCGGCGCGCCCTGTACTTCTCTTCCCTGG                           |
|             | 3                                        | 3' 929d24 (m79)                          | GCTTATATCTCATAAAACCTC                                     |
|             |                                          | 5' pbelo del loxp                        | ATCCGATGCAAGTGTGTCGCT                                     |
|             |                                          | 3' pbelo del loxp SacI                   | GCTAGAGCTCTCGCTTTTCCAGCACCTGTCGT                          |
|             |                                          | 5' 929d24 Xba-Iceul (md90c)              | CCTCTCTAGACTTAACATAACGGTCTAAGGTAGCGAGGGATGACAGATTCTCTGTTC |
|             | 4                                        | 3' 929d24 mIgH (md90)                    | TTGATGGTTCCTATCTCTAT                                      |
|             |                                          | 5' up VI149 (m56)                        | ACCACACAGCCTTCCACAAGAG                                    |
|             |                                          | 3' up VI149 AscI-EcoRI (m57b)            | CTCCGAATTCGGCGCGCCTGTCAGGTGTAGAGAGCATTGG                  |
|             |                                          | 5' pbelo del cm AvrII                    | CTCCCTAGGCGCGGTAGTGATCTTATTTT                             |
|             | 5                                        | 3' pbelo del cm                          | CAATCCAGGCTCTGACCGTTC                                     |
|             |                                          | 5' up mAdam6                             | TGGTTTTCTGGAGTCTAACG                                      |
|             |                                          | 3' up mAdam6 AsiSI-AgeI                  | CTCCACCGGTGCGATCGCGACCTCAGCACATAATAGAGAC                  |
|             |                                          | 5' down2 mAdam6 AsiSI-KpnI               | CTCCGGTACCGCGATCGCCCTTGATCCACTTGAACCTGAGCA                |
| 6           | 3' down2 mAdam6                          | GGAATGACCATCCTTGACCTCA                   |                                                           |
|             | 3' pbelo del cm                          | CAATCCAGGCTCTGACCGTTC                    |                                                           |
|             | 5' pbelo del cm MfeI                     | CTCCAATTGCCCGGTAGTGATCTTATTTT            |                                                           |
|             | 5' down 1708 FseI-BamHI (h34b)           | CTCCGGATCCGGCGGCCAGTGAAGCCAAGAACCTGCC    |                                                           |
| 7           | 3' down 1708 (h35)                       | CCTCATACCCAGAAGAATCAGC                   |                                                           |
|             | 5' 302 a07 (m53)                         | AGGCCACGAGGCCCTGCCACA                    |                                                           |
|             | 3' 302a07 Nsil (m54)                     | CCTCATGCATGAGTTCACACACAAGGAGGAA          |                                                           |
|             | 3' pbelo del loxp AvrII                  | CCTCCCTAGGCTCGCTTTTCCAGCACCTGTCGT        |                                                           |
| 8           | 5' pbelo del loxp                        | ATCCGATGCAAGTGTGTCGCT                    |                                                           |
|             | 5' up hlgK V-J short del (h43)           | AGACGCTGGACAAAGGGATG                     |                                                           |
|             | 3' up hlgK V-J short del AvrII (h44)     | CTCCGAGCTCAAAGTTGGTTCAAAGGACGATG         |                                                           |
|             | 5' down hlgK short del AscI-BamHI (h46b) | CTCCGGATCCGGCGCGCCCTCTGAAGTACGGCTTTTCTGG |                                                           |
| 9           | 3' down hlgK V-J short del (h47)         | TAAGAAGGAGGATAGGAGGCG                    |                                                           |

# Table S4. qPCR probes

Table S4. qPCR probes

| Probe name | Description          | Forward primer              | Probe                              | Reverse primer                | Probe copy numbers |            |               |          |           |           |           |          |                 |                |   |
|------------|----------------------|-----------------------------|------------------------------------|-------------------------------|--------------------|------------|---------------|----------|-----------|-----------|-----------|----------|-----------------|----------------|---|
|            |                      |                             |                                    |                               | IgH PC het         | IgH DC het | PC/DC cre het | 6hVK het | 16hVK het | 30hVK het | 40hVK het | 40hVK ho | 40hVK-Adam6 het | 40hVK-Adam6 ho |   |
| mlgHp2     | prox mlgH deletion   | GCCATGCAAGGCCAAGC           | CCAGGAAATGCTGCCAGAGCCTG            | AGTTCTTGAGCCTTAGGGTGCTAG      | 1                  | 1          | 1             | 1        | 1         | 1         | 1         | 1        | 0               | 1              | 0 |
| mlgHp1     | prox mlgH deletion   | ATGGGTCTGGGTGACGGAC         | TCTGCCTGCTGGTCTGTGGTGACATT         | TGGCAGATCCTTCATCATACTTACAG    | 1                  | 1          | 1             | 1        | 1         | 1         | 1         | 1        | 0               | 1              | 0 |
| mlgHd10    | distal mlgH deletion | GGTGTGCGATGTACCCCTGAAAC     | CTAAAAATGCTACACCTGGGGCAAACACCTG    | TGTGGCAGTTAATCCAGCTTTATC      | 2                  | 1          | 1             | 1        | 1         | 1         | 1         | 1        | 0               | 1              | 0 |
| mlgHd57-1  | distal mlgH deletion | CACAGAATGCTTGTCTTTACCAGC    | ATGGCATATGATAGATAGGTAGCGATTACAACCC | AGGAGACATGCTCACTGAATAGAGAAG   | 2                  | 1          | 1             | 1        | 1         | 1         | 1         | 1        | 0               | 1              | 0 |
| mlgHA7     | mlgH deletion        | TGGTACCTCCAGGAGCCTC         | AGTCTCTGCTTCCCCCTTGTGGCTATGAGC     | GCTGCAGGGGTATCAGGTGC          | 2                  | 2          | 1             | 1        | 1         | 1         | 1         | 1        | 0               | 1              | 0 |
| 887-10     | mlgH deletion        | GATGGGAAGAGACTGTAACATTTGTAC | CCTCCACTGTGTAATGGCTGCCACAA         | TTCCTATTCTACTCTTTGAGGCTC      | 2                  | 2          | 1             | 1        | 1         | 1         | 1         | 1        | 0               | 1              | 0 |
| hlgK5      | 6 hVK insertion      | CCCCGTCCTCTCCTTTTTC         | TCATGTCCATTAACCCATTTACCTTTTGCCCA   | TGCAAGTGTGCCAGCAAG            | 0                  | 0          | 0             | 1        | 1         | 1         | 1         | 2        | 1               | 2              | 2 |
| hlgK6      | 6 hVK insertion      | GTCAGCACTGCTGGCACAC         | AACCCCTGTGCTATTGAATTGCTATGCTGTCAG  | TGTTGTAGACCCCTCCGCCAC         | 0                  | 0          | 0             | 1        | 1         | 1         | 1         | 2        | 1               | 2              | 2 |
| hlgK11     | 16 hVK insertion     | GCAAAGAAGCTGTGTGAACGC       | CACCCCTGGGGCTGAAACCTGCA            | CAGTCACAGGAAAGGCAGGG          | 0                  | 0          | 0             | 0        | 1         | 1         | 1         | 2        | 1               | 2              | 2 |
| hlgK12     | 16 hVK insertion     | TTGCTTTCTCACACCTGACAG       | CAGCCCATCCTGTCACTTCGCTGGA          | TGGCCCAACAGTACAGCTCAG         | 0                  | 0          | 0             | 0        | 1         | 1         | 1         | 2        | 1               | 2              | 2 |
| hlgK15     | 30 hVK insertion     | CAGGTGCAAAGGTGACCACAG       | TGGTCTGCCCATCCATGCA                | GGCAGCCTGAGTGTGAGAGC          | 0                  | 0          | 0             | 0        | 0         | 1         | 1         | 2        | 1               | 2              | 2 |
| hlgK25     | 30 hVK insertion     | GTTCAAGCCCCACAGACTCTC       | TCCTCTGGGAGCAACATGAAGTTCCCT        | CCTGAAGCCATGAGGGCAG           | 0                  | 0          | 0             | 0        | 0         | 1         | 1         | 2        | 1               | 2              | 2 |
| hlgK26     | 40 hVK insertion     | TGGCCGTTATGCTAGTACCA        | TGGCTTACCCCTTTGAAGGGCCC            | CACAGCTGAAGCAGGATGAGC         | 0                  | 0          | 0             | 0        | 0         | 0         | 1         | 2        | 1               | 2              | 2 |
| hlgK32     | 40 hVK insertion     | AGCACTGCTGCATGGCTTC         | TGGGTGGAGCCAAGTCTCGCAC             | TGAGTAATAAAGGAGAGAAAAGTTTGGGA | 0                  | 0          | 0             | 0        | 0         | 0         | 1         | 2        | 1               | 2              | 2 |

Fig S2A

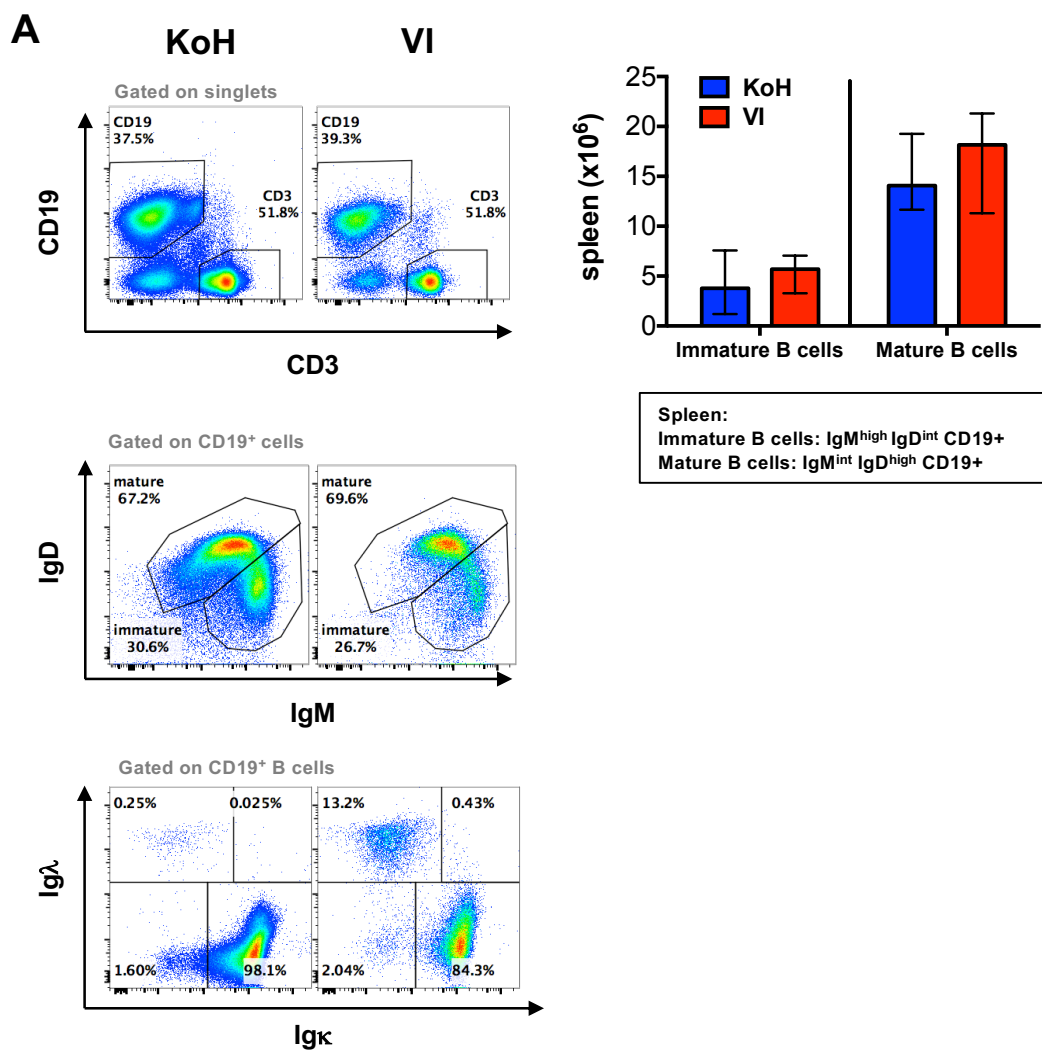

Fig S2B

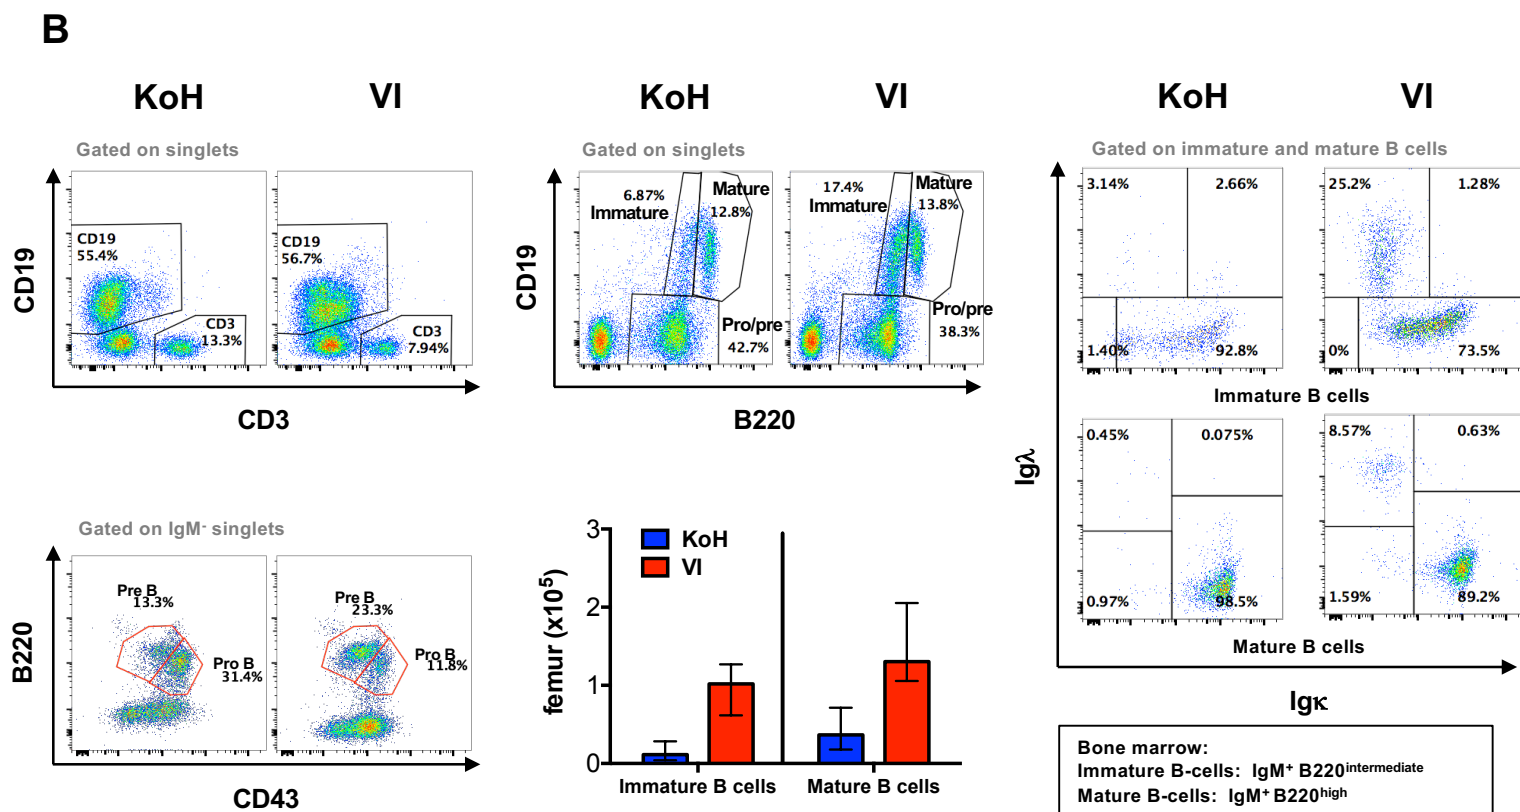

**Figure S2.** Normal B cell development in the spleen of KoH mice, compared to VI mice, despite altered B cell development in the bone marrow. (A) Flow cytometry analysis of the spleen and quantitation of CD19<sup>+</sup> IgM<sup>high</sup> IgD<sup>int</sup> immature and CD19<sup>+</sup> IgM<sup>int</sup> IgD<sup>high</sup> mature B cells per spleen of KoH vs. VI. (B) Flow cytometry analysis of bone marrow B cells, including IgM<sup>-</sup> CD43<sup>high</sup> B220<sup>int</sup> Pro B cells and IgM<sup>-</sup> CD43<sup>int</sup> B220<sup>int</sup> Pre-B cells, and quantitation of IgM<sup>+</sup> B220<sup>int</sup> immature and IgM<sup>+</sup> B220<sup>high</sup> mature B cells per femur of KoH vs. VI mice. Cross bar shows median with interquartile range. *n*=10 KoH and *n*=8 VI mice.

Fig S3

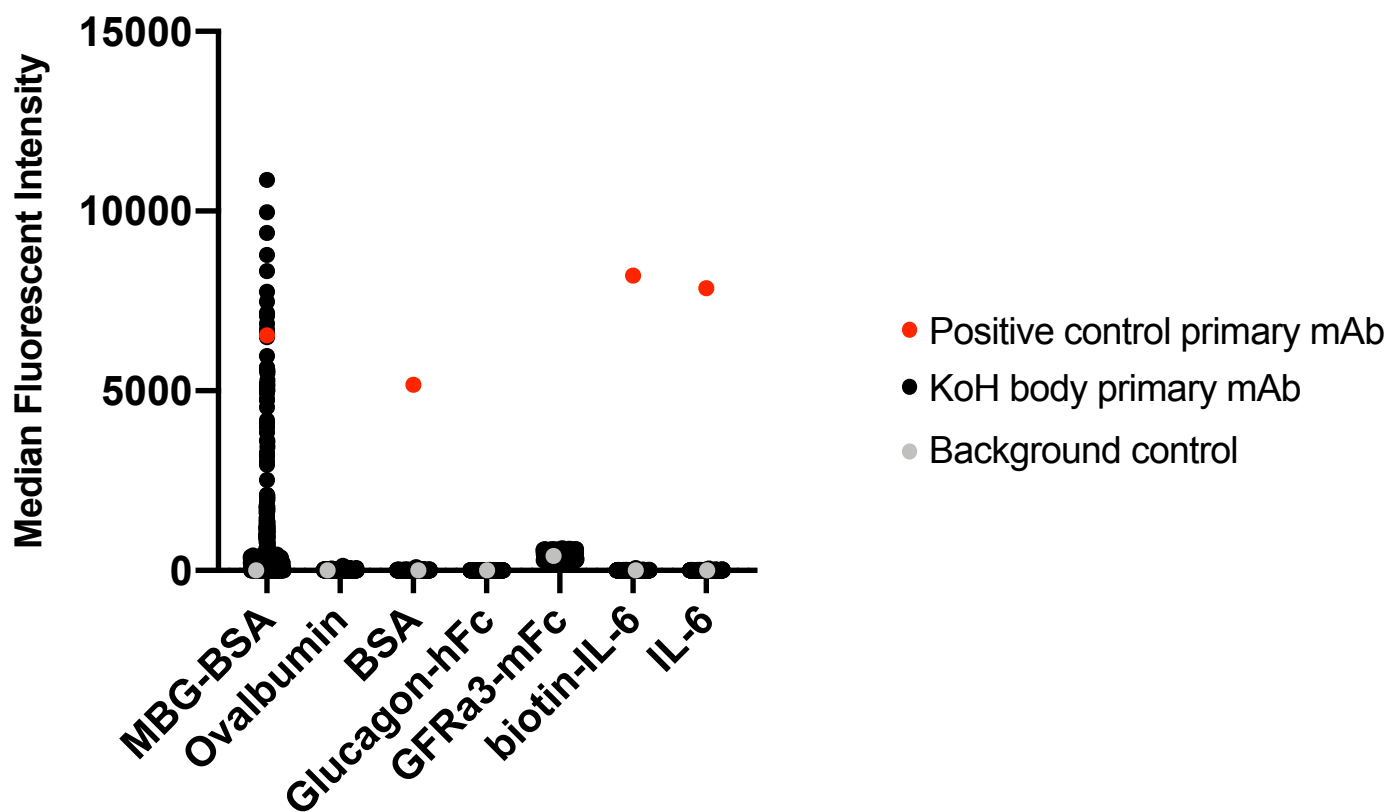

**Figure S3:** KoH-bodies do not bind irrelevant proteins. Luminex screening was performed by coupling the immunogen (MBG-BSA) or irrelevant proteins (ovalbumin, BSA, Glucagon-hFc, GFRA3-mFc, biotin-IL6 or IL-6) to Luminex beads, followed by incubation with KoH bodies (n=339), before staining with PE-conjugated anti-mouse IgG F(ab')<sub>2</sub> specific secondary antibody (black circles). Background control values were determined following staining of beads coupled to above MBG-BSA or irrelevant proteins, then incubated with buffer control, before staining with above mentioned secondary antibody (grey circles). Positive control values were determined following staining of beads coupled to MBG-BSA, BSA or -biotin-IL-6 (or -IL-6 alone) with anti-MBG (mIgG1), anti-BSA (mIgG1) or anti-IL-6 (mIgG1) primary antibody, respectively, before staining with above mentioned secondary antibody (red circles).

Fig S4

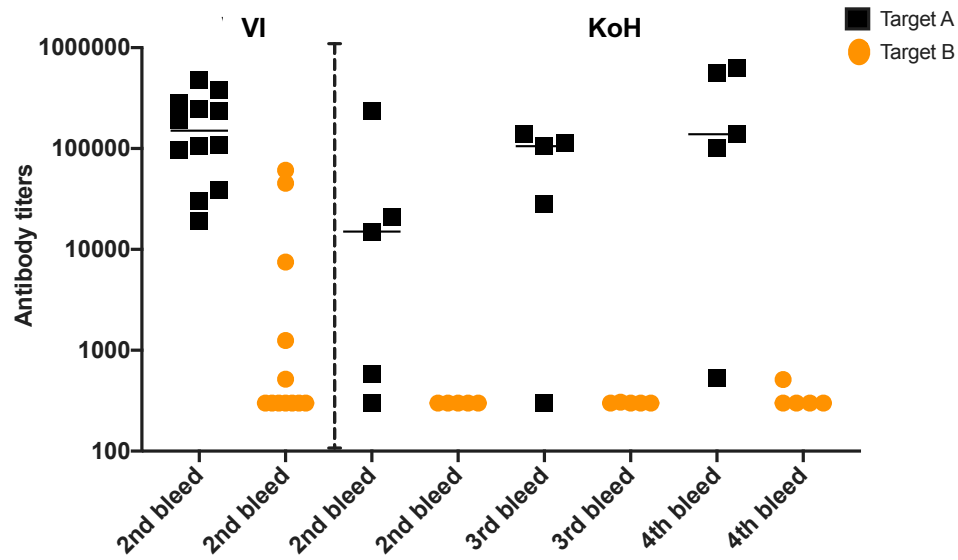

**Figure S4.** KoH mice elicit high anti-Target A antibody titers post-immunization. Mice were immunized with Target A protein (containing His tag) as immunogen via f.p. (VI) and i.p route followed by f.p. boosts (KoH) respectively. Antibody titers against Target A was assayed by a standard ELISA with Target A and irrelevant Target B protein (containing a His tag) coated plates

## Table S5

**Table S5. Oligonucleotide primers used for antibody repertoire sequencing**

|                                         |                 |                                                                                  |
|-----------------------------------------|-----------------|----------------------------------------------------------------------------------|
| <b>RT primers</b>                       | <b>IgM</b>      | 5' - TCTTATCAGACAGGGGGCTCTC - 3'                                                 |
|                                         | <b>IgK</b>      | 5' - AAGAAGCACACGACTGAGGCAC- 3'                                                  |
| <b>1<sup>st</sup> round PCR primers</b> | <b>IgM</b>      | 5' - ACACTCTTTCCTACACGACGCTCTTCCGATCT<br>GGGAAGACATTTGGGAAGGAC - 3'              |
|                                         | <b>IgK</b>      | 5' - ACACTCTTTCCTACACGACGCTCTTCCGATCT<br>GGAAGATGGATACAGTTGGTGC - 3'             |
|                                         | <b>PE2-PIIA</b> | 5' - GTGACTGGAGTTCAGACGTGTGCTCTTCCGATCT<br>AAGCAGTGGTATCAACGCAGAGT - 3'          |
| <b>2<sup>nd</sup> round PCR Primers</b> | <b>Forward</b>  | 5' - AATGATACGGCGACCACCGAGATCTACACXXXXXX<br>ACACTCTTTCCTACACGACGCTCTTCCGATCT- 3' |
|                                         | <b>Reverse</b>  | 5' - CAAGCAGAAGACGGCATAACGAGATXXXXXX<br>GTGACTGGAGTTCAGACGTGTGCTCTTCCGATCT- 3'   |

# Table S6

Table S6. Binding constants (25°C) and thermodynamic parameters for anti- MBG monoclonal antibody interactions determined using ITC and Biacore

| Antibody   | mouse strain | VL Protein /mAb | ITC      |                                         |                      |                           | Biacore                                                 |                                         |                                         |                                   |
|------------|--------------|-----------------|----------|-----------------------------------------|----------------------|---------------------------|---------------------------------------------------------|-----------------------------------------|-----------------------------------------|-----------------------------------|
|            |              |                 | <i>N</i> | <i>K<sub>D</sub></i> (M) <sup>ITC</sup> | $\Delta H$ (cal/mol) | (-) $T\Delta S$ (cal/mol) | <i>k<sub>a</sub></i> (M <sup>-1</sup> s <sup>-1</sup> ) | <i>k<sub>d</sub></i> (s <sup>-1</sup> ) | <i>K<sub>D</sub></i> (M) <sup>SPR</sup> | <i>t</i> <sub>1/2</sub> (seconds) |
| mAb 3E9    | BALB/C       | Control mAb 1   | 2.1      | 2.49E-07                                | -7073                | -1931                     | 1.03E+06                                                | 5.85E-02                                | 5.68E-08                                | 12                                |
| H4H14357P  | KoH          | VL Protein 1    | 1.97     | 3.48E-08                                | -9135                | -1037                     | 4.82E+06                                                | 4.58E-02                                | 9.50E-09                                | 15                                |
| H4H14362P  | KoH          | VL Protein 2    | 1.59     | 1.79E-08                                | -14460               | 3904                      | 6.40E+05                                                | 7.43E-03                                | 1.16E-08                                | 93                                |
| H4H14371P  | KoH          | VL Protein 3    | 1.72     | 4.81E-08                                | -11820               | 1842                      | 1.35E+06                                                | 5.98E-03                                | 4.43E-09                                | 116                               |
| H4H14372P  | KoH          | VL Protein 4    | 1.63     | 6.62E-08                                | -11480               | 1690                      | 1.19E+06                                                | 7.11E-03                                | 5.97E-09                                | 97                                |
| H4H14373P  | KoH          | VL Protein 5    | 2.03     | 4.59E-08                                | -12690               | 2682                      | 8.50E+05                                                | 7.41E-03                                | 8.72E-09                                | 94                                |
| H4H14401P  | KoH          | VL Protein 6    | 1.81     | 6.29E-09                                | -18850               | 7659                      | 1.01E+06                                                | 4.46E-03                                | 4.42E-09                                | 156                               |
| H4H14407P  | KoH          | VL Protein 7    | 1.85     | 7.87E-07                                | -9984                | 1660                      | 1.04E+05                                                | 2.02E-01                                | 1.94E-06                                | 3                                 |
| H4H14416P  | KoH          | VL Protein 8    | 1.9      | 4.74E-08                                | -12690               | 2697                      | 2.42E+06                                                | 8.10E-02                                | 3.35E-08                                | 9                                 |
| H4H14453P2 | VI3          | Control mAb 2   | 2.06     | 8.70E-07                                | -9778                | 1508                      | nd                                                      | nd                                      | *6.3E-06                                | nd                                |

nd: not determined

\*: Steady state *K<sub>D</sub>* analysis



# Table S7

Table S7. Cross Reactivity of anti-MBG KoH Antibodies

| Ab PID #         | ITC<br>K <sub>D</sub> [M], 10 $\mu$ M                                             |                                                                                   |                                                                                   |                                                                                   |                                                                                   |                                                                                   |                                                                                   |                                                                                    |                                                                                     |                                                                                     |
|------------------|-----------------------------------------------------------------------------------|-----------------------------------------------------------------------------------|-----------------------------------------------------------------------------------|-----------------------------------------------------------------------------------|-----------------------------------------------------------------------------------|-----------------------------------------------------------------------------------|-----------------------------------------------------------------------------------|------------------------------------------------------------------------------------|-------------------------------------------------------------------------------------|-------------------------------------------------------------------------------------|
|                  | Bufadienolides                                                                    |                                                                                   |                                                                                   |                                                                                   |                                                                                   |                                                                                   | Cardenolides                                                                      |                                                                                    |                                                                                     |                                                                                     |
|                  |  |  |  |  |  |  |  |  |  |  |
| Natural MBG      | Synthetic MBG                                                                     | Bufalin                                                                           | Cinobufagin                                                                       | Cinobufotalin                                                                     | Resibufagenin                                                                     | Ouabain                                                                           | Digoxin                                                                           | Nerifolin                                                                          | Digitoxin                                                                           |                                                                                     |
| H4H14371P        | 5.88E-08                                                                          | 7.41E-08                                                                          | WB                                                                                | WB                                                                                | 7.63E-08                                                                          | 7.69E-08                                                                          | NB                                                                                | NB                                                                                 | NB                                                                                  | NB                                                                                  |
| H4H14401P        | 3.61E-08                                                                          | 8.55E-08                                                                          | WB                                                                                | 5.03E-08                                                                          | 6.33E-08                                                                          | 7.69E-08                                                                          | NB                                                                                | NB                                                                                 | NB                                                                                  | NB                                                                                  |
| H4H14357P        | 3.58E-08                                                                          | 7.75E-08                                                                          | WB                                                                                | 5.29E-06                                                                          | 9.01E-08                                                                          | 2.04E-06                                                                          | NB                                                                                | NB                                                                                 | NB                                                                                  | NB                                                                                  |
| 3E9              | 1.56E-07                                                                          | 3.27E-07                                                                          | NB                                                                                | NB                                                                                | 1.69E-07                                                                          | NB                                                                                | NB                                                                                | NB                                                                                 | NB                                                                                  | NB                                                                                  |
| Iso type control | NB                                                                                 | NB                                                                                  | NB                                                                                  |

NB: No Binding

WB: Weak Binding observed, but K<sub>D</sub> could not be determined under these experimental conditions

Fig. S5

### KoH MABs fail to elicit immune responses in VI3 mice

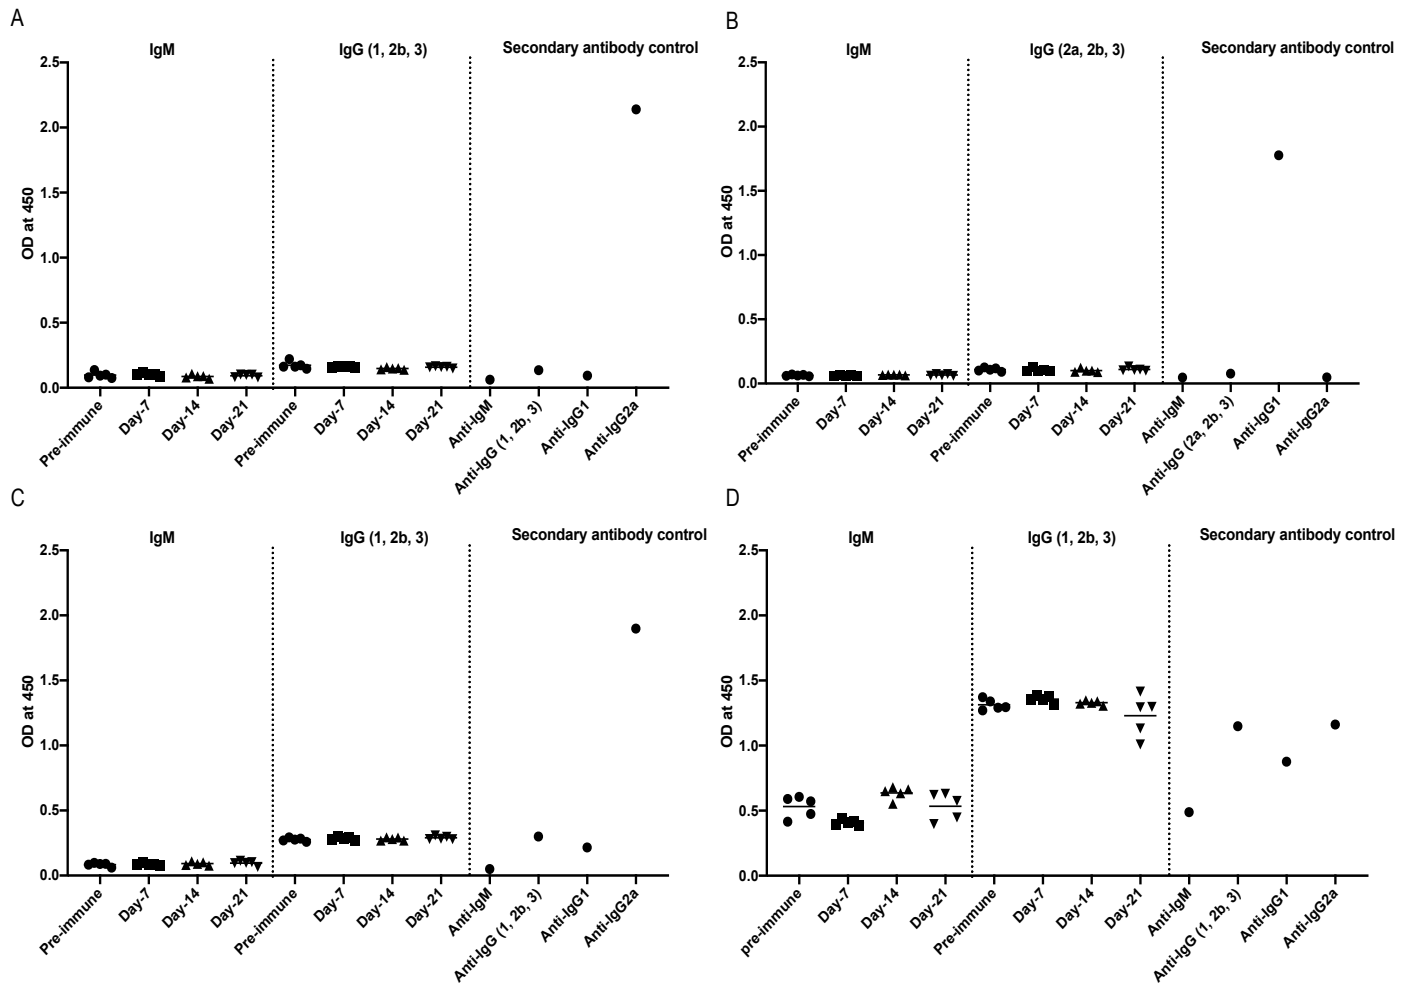

**Figure S5.** KoH-bodies do not elicit immune responses in VI mice. VI mice were immunized with KoH-bodies against Targets C and D (panels A, B, respectively), a VI antibody with a human variable domain and mFc to protein E (panel C), and a mouse antibody with mouse variable domain and mFc to protein F (panel D) as immunogens without adjuvant via f.p.route. Immune responses were determined by ELISA using the respective immunogens as coating antigen. IgM and IgG antibody responses were detected as indicated with HRP-conjugated anti-mouse IgM or a cocktail of HRP-conjugated anti-mouse IgG isotypes, excluding the isotype of the coating antigen.

Fig S6A

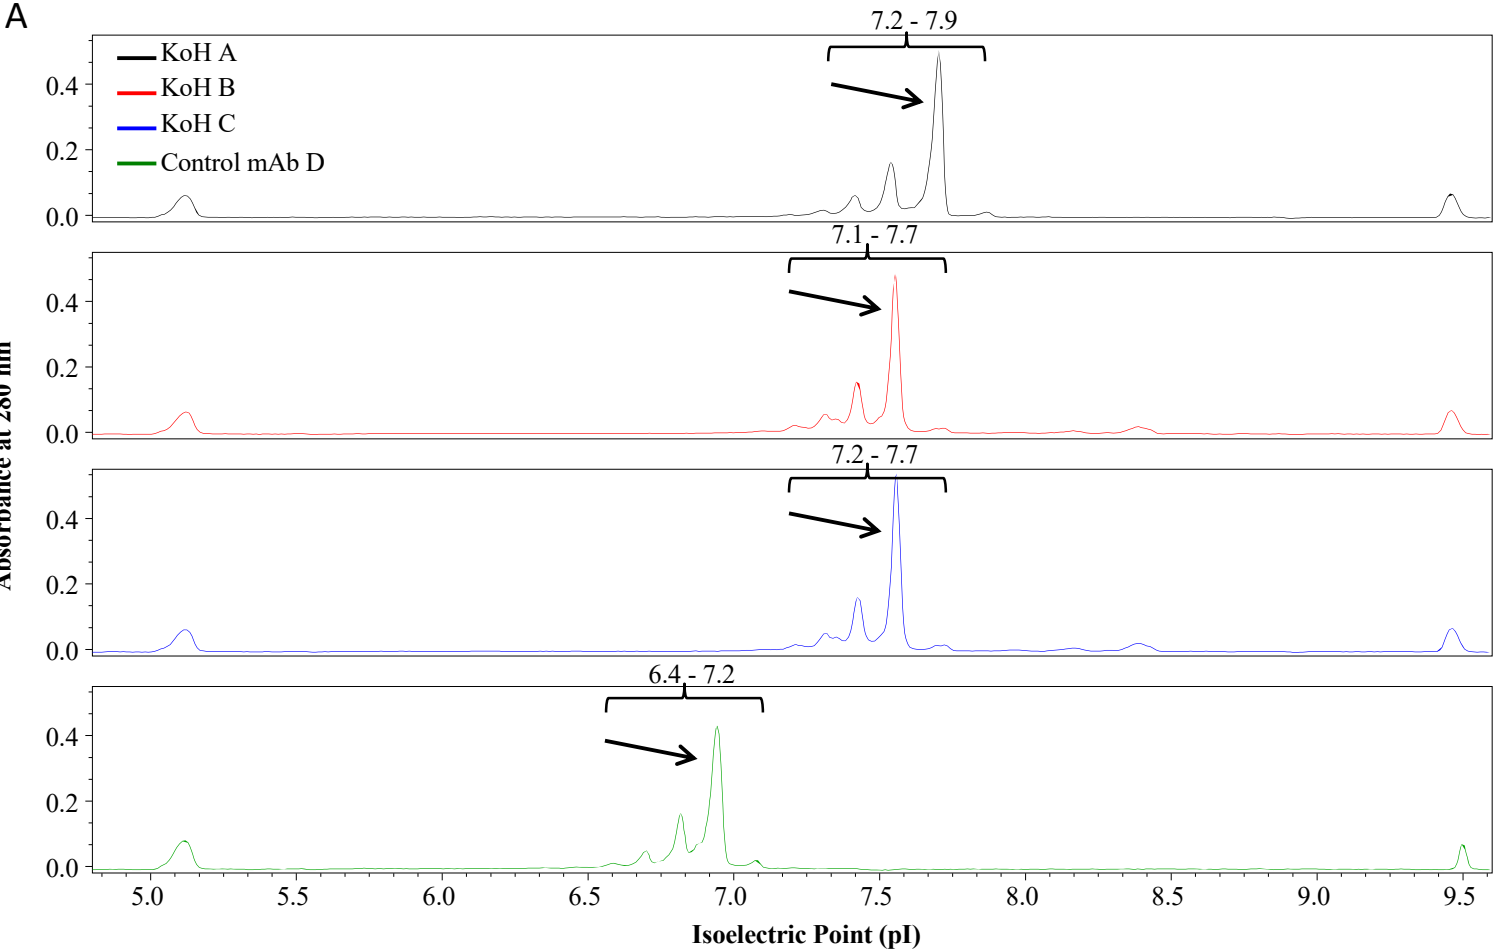

Fig S6B

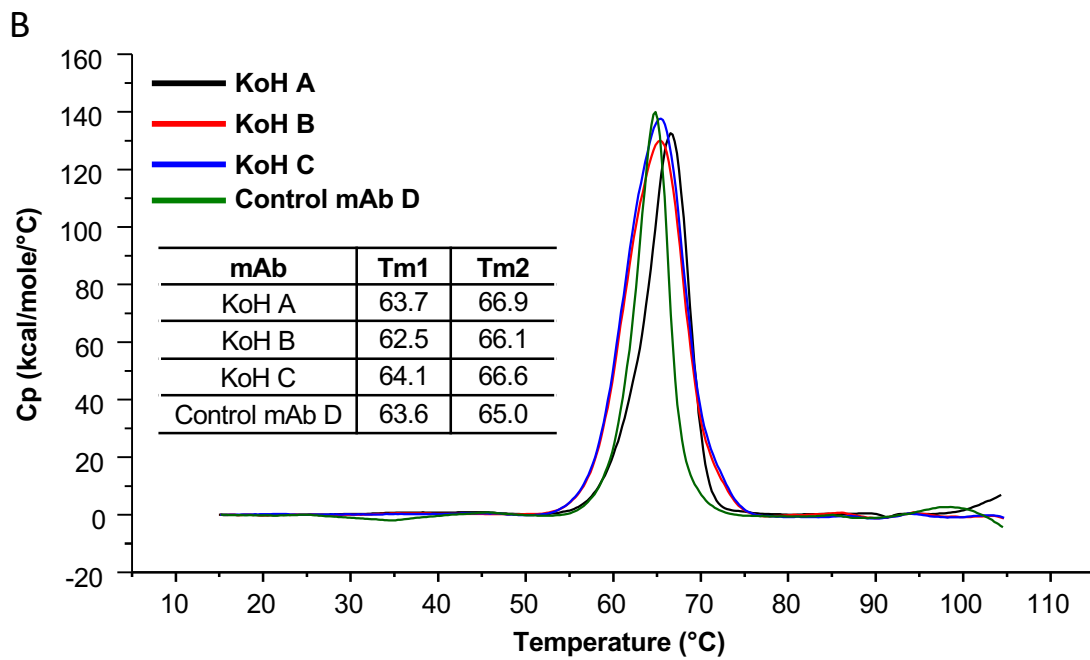

Fig S6C

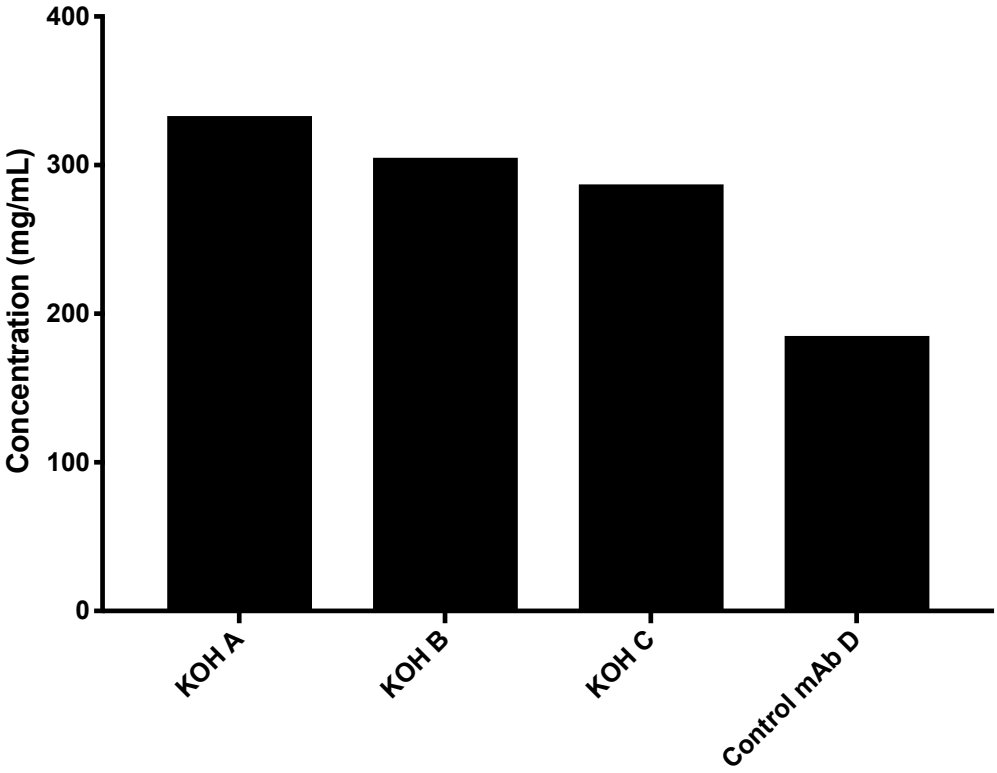

Fig S6D

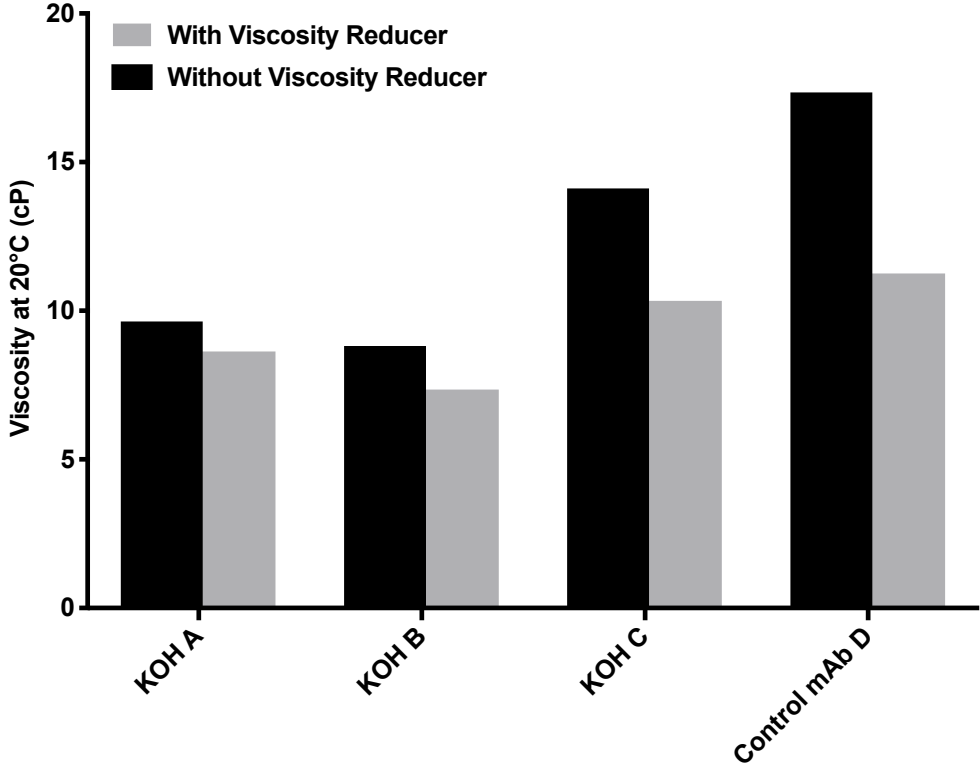

Fig S6E

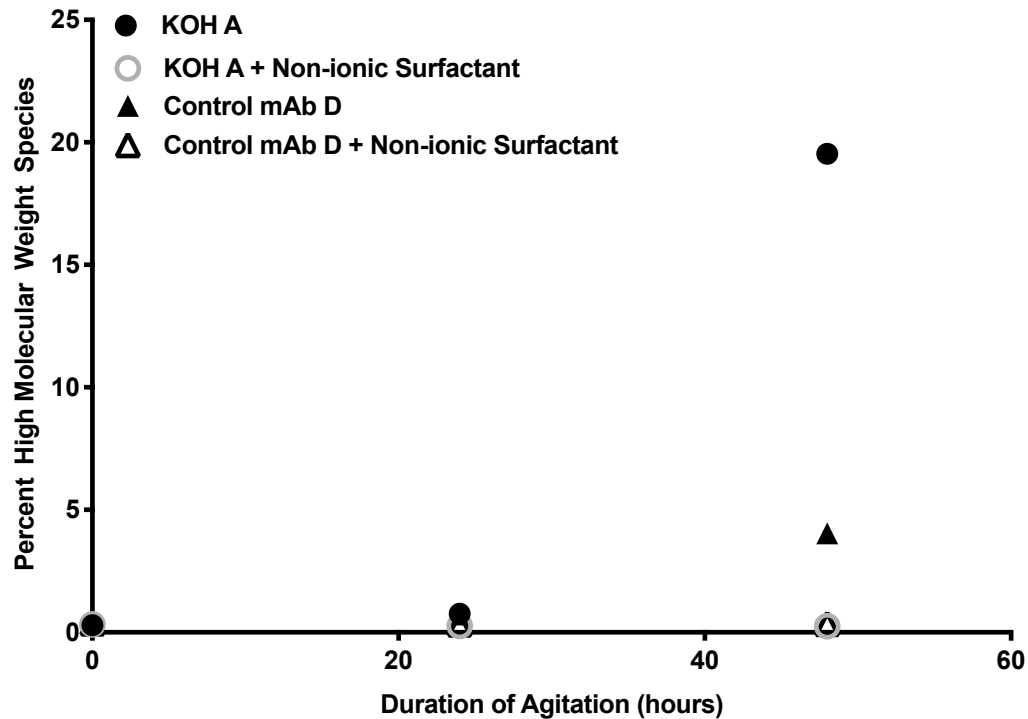

**Figure S6.** Biophysical properties of three KoH-bodies (KoH A: H4H14357P, KoH B: H4H14371P, KoH C: H4H14401P) compared to a normal VI antibody (mAb D: REGN1193) (A) Differential Scanning Calorimetry thermograms of monoclonal antibody molecules as a plot of heat capacity ( $C_p$ ) and temperature ( $^{\circ}$  C). A single transition was observed with a weak shoulder indicating a possible second transition. Data was fitted to MN2- State model with two transitions to calculate the midpoint of two melting transitions defined as  $T_{m1}$  and  $T_{m2}$ . (B) Determination of isoelectric point (pI) and charge variant profile of mAb molecules by imaged capillary isoelectric focusing (iCIEF). The brackets define the observed charge variant species and the range of pI values. The arrow indicates the species (defined as the main peak) that was used to determine the pI of the mAb molecule. (C) Solubility of KoH-bodies. Centrifugal based concentration was performed to assess the highest concentration achievable without any visible appearance of precipitate. Protein concentration was determined using a UV spectrophotometer. (D) Viscosity of KoH-bodies and the effect of viscosity reducer. Viscosity was measured at protein concentration of 175 mg/mL with or without the viscosity reducing agent. Samples were measured using m-VROC viscometer maintaining the sample temperature at  $20^{\circ}$  C. (E) Agitation Studies of KoH-bodies. High molecular weight species were determined by SE-UPLC analysis of KoH bodies after agitation for upto 48 hours at room temperature.

Fig S7

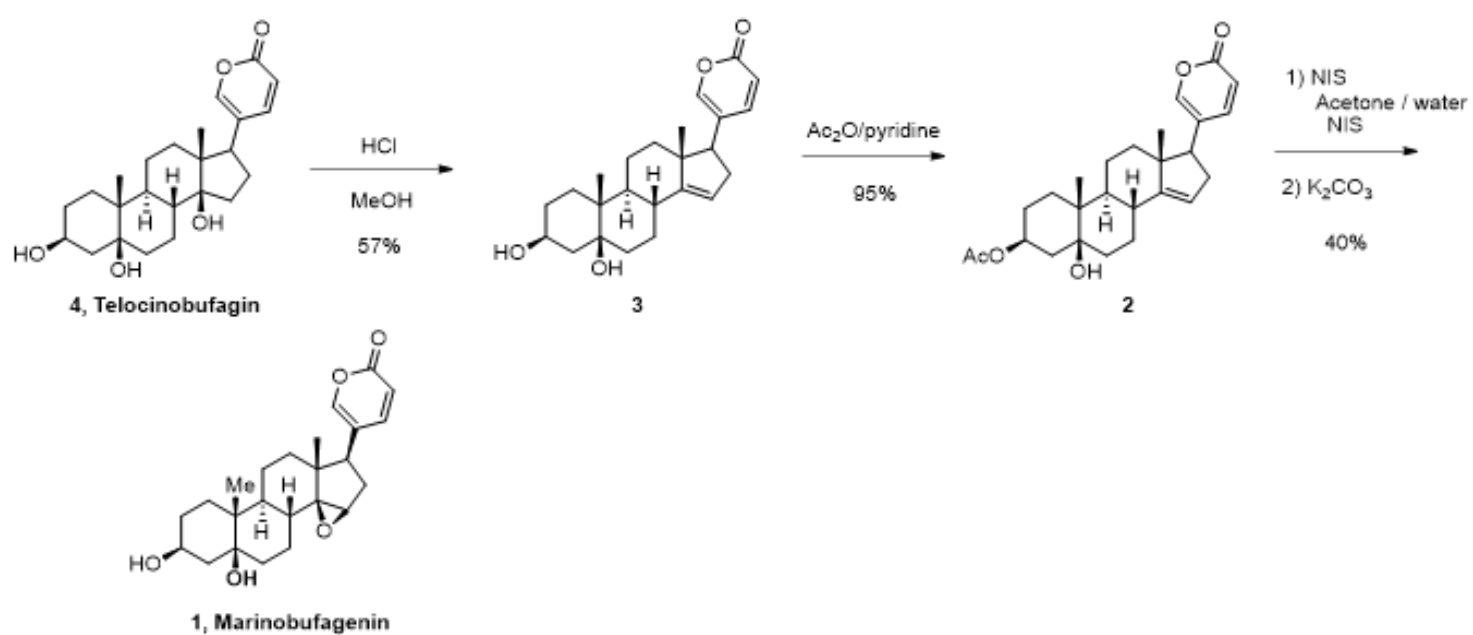

**Fig S7 Synthesis of Marinobufagenin from Telocinobufagin**

Marinobufagenin was synthesized by a modification of the method described by Pettit and Kamano [43].



Fig S8

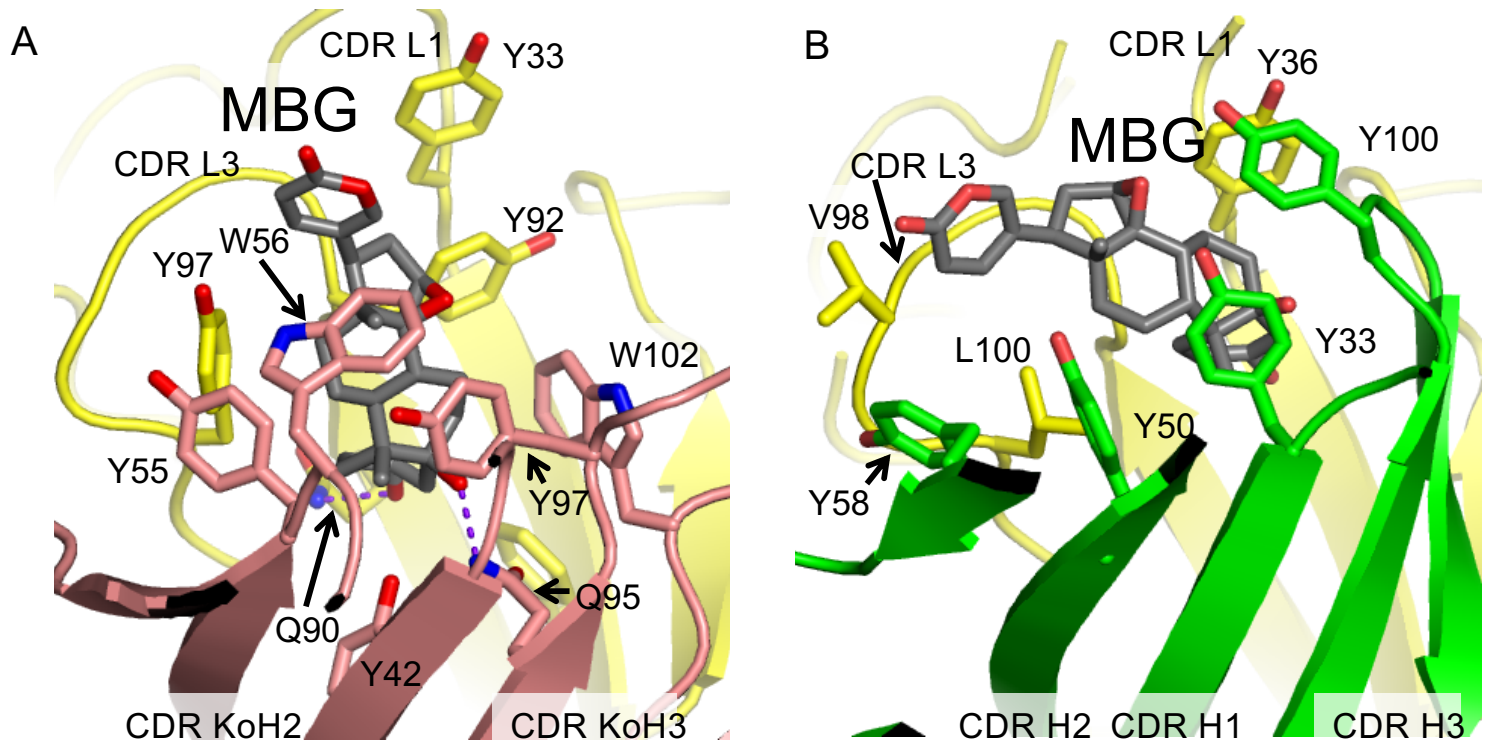

**Figure S8.** Comparison of crystal structures of MBG bound to the Fab fragment of KoH-body H4H14401P (A) or to the conventional Fab 3E9 (B). Bound MBG and selected amino acid side chains from the Fabs are shown in stick form, colored as in Fig. 7, along with a cartoon representation of the C backbone of the Fab. Two hydrogen bonds between MBG and KoH-body Fab are shown as purple dashed lines in panel A.

Fig S9

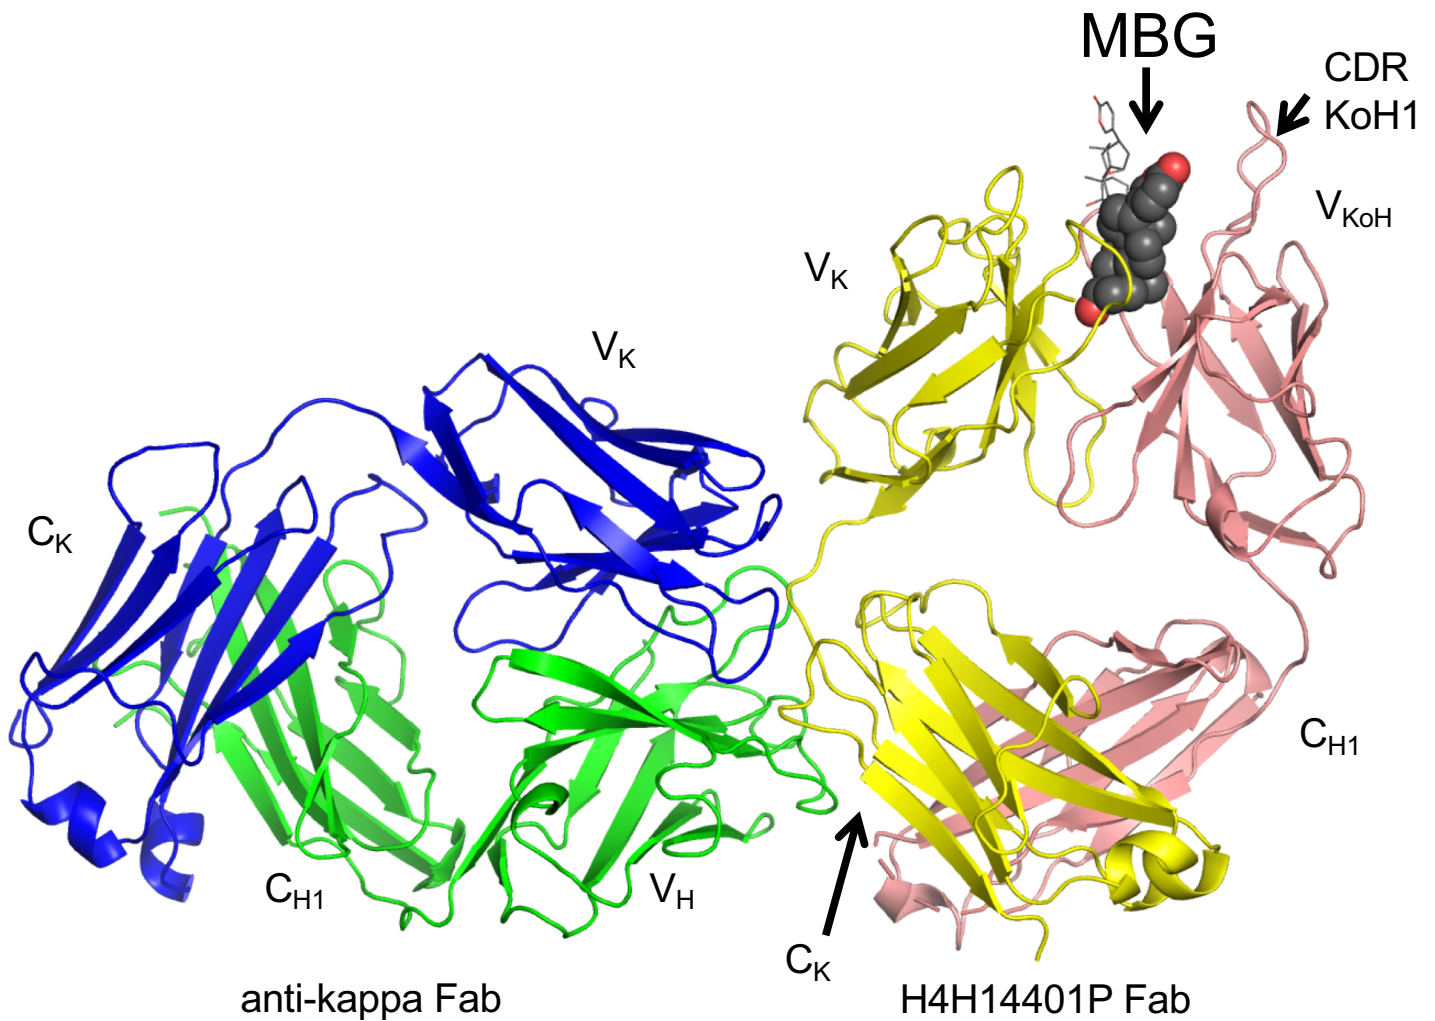

**Figure S9.** Complete depiction of the KoH Fab crystal structure. The complex of MBG and KoH-body Fab is shown exactly as in Fig. 7A, but the bound anti-kappa Fab is not omitted. The heavy chain of the anti-kappa Fab is colored green, and the light chain is colored blue. A second MBG molecule is shown in thin lines; this molecule bridges a crystal contact with a symmetry-related copy of the KoH Fab C<sub>κ</sub> domain.

Fig S10

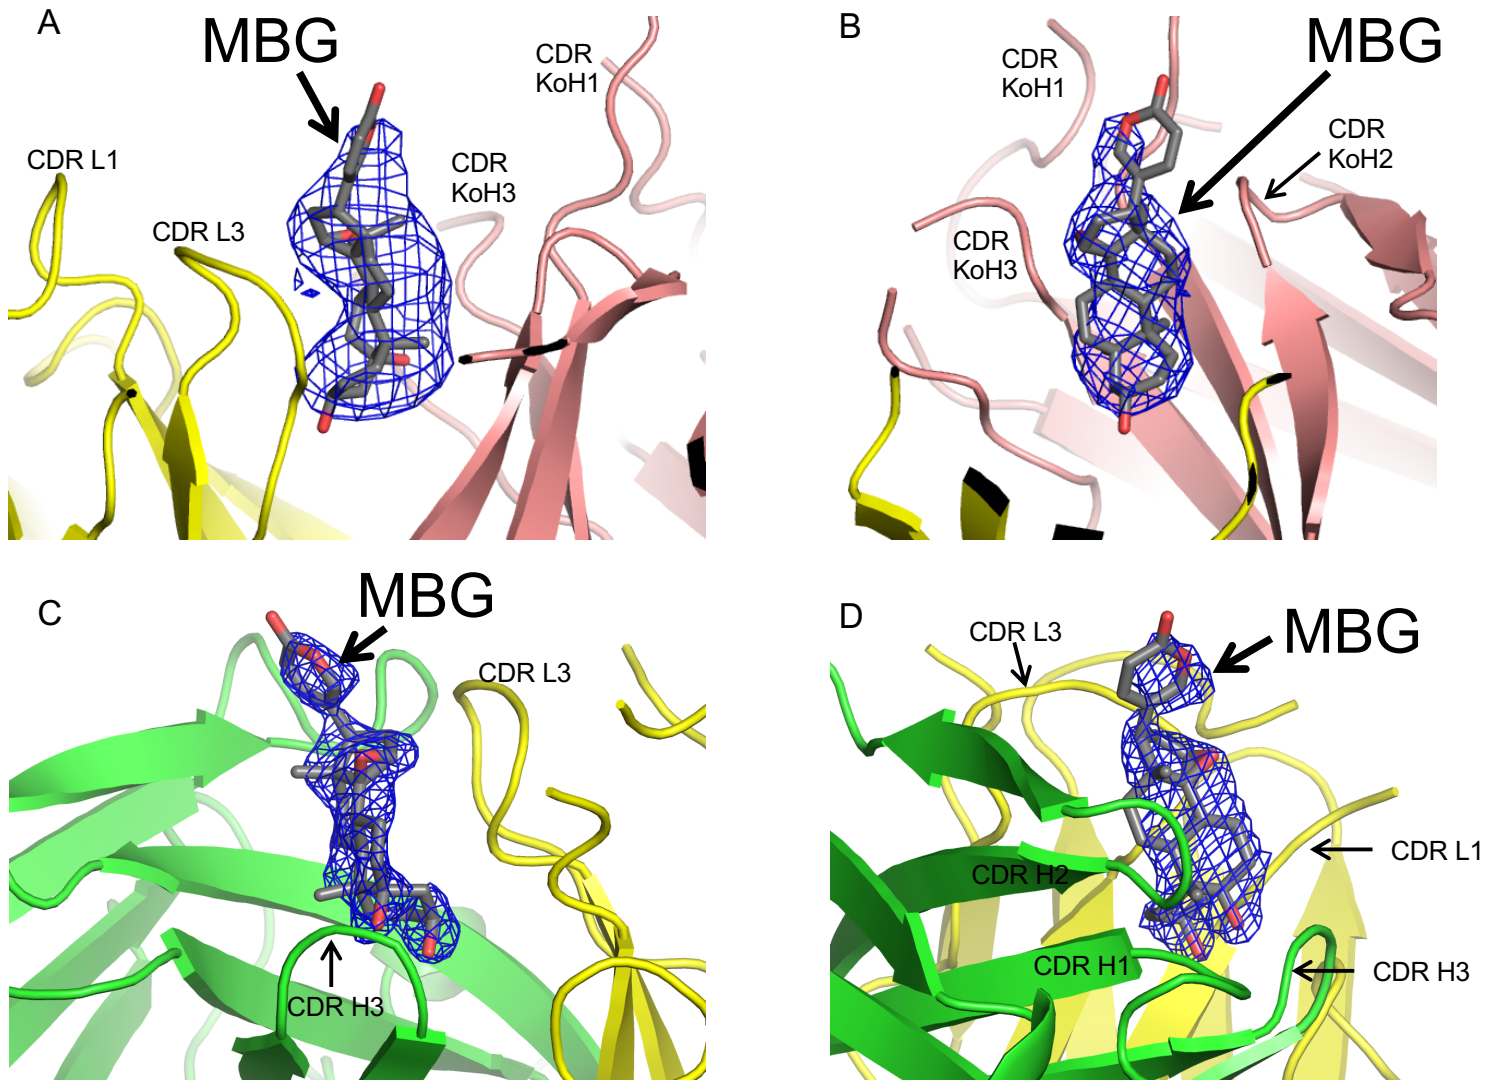

**Figure S10.** Electron density defining the position and orientation of the MBG molecule. (A) and (B): An  $m(\text{Fo}) - D(\text{Fc})$  difference electron density map is depicted in blue mesh, superimposed on the final KoH Fab + MBG crystal structure, with the KoH Fab depicted as in Figs. 7B and S6. This map was calculated at the last round of refinement before MBG was added to the structure, and is contoured at +2.5 sigma, and drawn in the area around the final, refined MBG molecule, shown in stick form. Panels A and B show two different orientations of the same map and model. (C) and (D): The same depiction as in panels A and B, but for the 3E9 Fab + MBG structure. The electron density contour is +2.0 sigma.

# Table S8

Supplementary Table S8. Data Collection and Refinement Statistics

| Complex                                                   | KoH Fab + MBG                                                                                                                    | 3E9 Fab + MBG                               |
|-----------------------------------------------------------|----------------------------------------------------------------------------------------------------------------------------------|---------------------------------------------|
| Data Collection Statistics                                |                                                                                                                                  |                                             |
| Space group                                               | I422                                                                                                                             | P1                                          |
| Unit cell (Å / °)                                         | 128.48 128.48 333.33 / 90.0 90.0 90.0                                                                                            | 49.92 67.69 71.99 / 97.37 106.35 107.00     |
| Data collection location                                  | Beamline 5.0.2, Advanced Light Source, LBNL                                                                                      | Beamline 5.0.2, Advanced Light Source, LBNL |
| Resolution (Å)                                            | 100 - 3.6                                                                                                                        | 80 - 2.0                                    |
| Unique reflections                                        | 15341                                                                                                                            | 51985                                       |
| R <sub>merge</sub> / R <sub>meas</sub> / R <sub>pim</sub> | 0.298 / 0.320 / 0.111                                                                                                            | 0.031 / 0.043 / 0.031                       |
| CC <sub>1/2</sub>                                         | ---                                                                                                                              | ---                                         |
| Completeness (%)                                          | 91.9                                                                                                                             | 89.7                                        |
| Average redundancy                                        | 8.4                                                                                                                              | 1.9                                         |
| I/σ(I)                                                    | 5.5                                                                                                                              | 17.4                                        |
| Refinement Statistics                                     |                                                                                                                                  |                                             |
| Resolution (Å)                                            | 47 - 3.6                                                                                                                         | 67 - 2.0                                    |
| Reflections used (free)                                   | 14000 (711)                                                                                                                      | 41801 (2269)                                |
| R factor                                                  | 0.234                                                                                                                            | 0.229                                       |
| R <sub>free</sub>                                         | 0.287                                                                                                                            | 0.276                                       |
| RMSD                                                      |                                                                                                                                  |                                             |
| bonds (Å)                                                 | 0.004                                                                                                                            | 0.008                                       |
| angles (°)                                                | 1.39                                                                                                                             | 1.33                                        |
| Ramachandran statistics                                   |                                                                                                                                  |                                             |
| Most favored (%)                                          | 92.8                                                                                                                             | 98.1                                        |
| Additional allowed (%)                                    | 5.3                                                                                                                              | 1.3                                         |
| Outliers (%)                                              | 1.9                                                                                                                              | 0.6                                         |
| Rotameric outliers (%)                                    | 2.0                                                                                                                              | 1.6                                         |
| Asymmetric unit contents                                  | KoH antibody Fab (chains H and L) bound to MBG, and an anti-kappa light chain antibody Fab (chains A and B) bound to the KoH Fab | Two copies of 3E9 antibody Fab bound to MBG |
| Average B factors*                                        | KoH Fab: 77; anti-kappa Fab: 124; MBG: 71                                                                                        | 3E9 Fabs: 32 and 32; MBGs: 30 and 36        |
| PDB code                                                  | 6PYC                                                                                                                             | 6PYD                                        |

\*TLS parameters and residual isotropic B factors were combined to produce anisotropic displacement parameters for each atom; the ADPs were then converted to an equivalent isotropic B factor for each atom; the isotropic B factors for all atoms were then averaged to produce the numbers listed here.
